# Supplementary material for: A systematic literature review to identify delivery strategies of digital health for low SEP populations
Source: Research Square preprint supplement (doi:10.21203/rs.3.rs-8659891/v1), 2026-02-02
Supplement: Supplementary file 1 [file 1173ba3c007c6515b8b64cff.xlsx]

## Sheet: Critical appraisal
Link naar alle critical appraisal tools: https://jbi.global/critical-appraisal-tools
RCT STUDIES																					Yes
Article information			Score		Bias related to selection and allocation				Bias related to administration of intervention/exposure			Bias related to assessment, detection, and measurement of the outcome			Bias related to participant retention	Statistical conclusion validity					No
ID Study	Title	Study Design	Score (Max=13, n=cases of yes)	Score (% yes)	Was true randomization used for assignment of participants to treatment groups?	Was allocation to treatment groups concealed?	Were treatment groups similar at the baseline?	Were participants blind to treatment assignment?	Were those delivering the treatment blind to treatment assignment?	Were treatment groups treated identically other than the intervention of interest?	Were outcome assessors blind to treatment assignment?	Were outcomes measured in the same way for treatment groups?	Were outcomes measured in a reliable way?	Was follow-up complete and, if not, were differences between groups in terms of their follow-up adequately described and analyzed?	Were participants analyzed in the groups to which they were randomized?	Was appropriate statistical analysis used?	Was the trial design appropriate and any deviations from the standard RCT design (individual randomization, parallel groups) accounted for in the conduct and analysis of the trial?				Unclear
2	Adherence to self-monitoring via interactive voice response technology in an eHealth intervention targeting weight gain prevention among Black women: randomized controlled trial.	RCT	9	0.692308	Yes	Yes	Yes	No	No	Yes	No	Yes	Yes	Yes	No	Yes	Yes				N/A
3	Advanced Health Information Technologies to Engage Parents, Clinicians, and Community Nutritionists in Coordinating Responsive Parenting Care: Descriptive Case Series of the Women, Infants, and Children Enhancements to Early Healthy Lifestyles for Baby (WEE Baby) Care Randomized Controlled Trial.	RCT	5	0.384615	Unclear	Unclear	Unclear	No	No	Yes	No	Yes	Yes	No	Unclear	Yes	Yes
4	A Social Care System Implemented in Pediatric Primary Care: A Cluster RCT	RCT	8	0.615385	Unclear	Yes	No	No	No	Yes	No	Yes	Yes	Yes	Yes	Yes	Yes
5	A Telehealth-supported, Integrated care with CHWs, and MEdication-access (TIME) Program for Diabetes Improves HbA1c: a Randomized Clinical Trial	RCT	8	0.615385	Yes	No	Yes	No	No	Yes	No	Yes	Yes	Yes	No	Yes	Yes
6	Comparison of community health worker-led diabetes medication decision-making support for low-income latino and african american adults with diabetes using E-health tools versus print materials	RCT	11	0.846154	Yes	Yes	No	No	Yes	Yes	Yes	Yes	Yes	Yes	Yes	Yes	Yes
8	Cost-effectiveness of on-site versus off-site collaborative care for depression in rural FQHCs	RCT	7	0.538462	Yes	No	Yes	No	No	Yes	No	Unclear	Yes	No	Yes	Yes	Yes
9	Effectiveness of an App and Provider Counseling for Obesity Treatment in Primary Care.	RCT	10	0.769231	Yes	Yes	Yes	No	No	Yes	No	Yes	Yes	Yes	Yes	Yes	Yes
9.1	Track: A randomized controlled trial of a digital health obesity treatment intervention for medically vulnerable primary care patients	RCT	10	0.769231	Yes	Yes	Yes	No	No	Yes	No	Yes	Yes	Yes	Yes	Yes	Yes
13	In-person versus electronic screening for social risks among carers of pediatric inpatients: A mixed methods randomized trial	RCT	9	0.692308	Yes	No	Yes	No	No	Yes	No	Yes	Yes	Yes	Yes	Yes	Yes
15	MivacunaLA (MyshotLA): A Community-Partnered Mobile Phone Intervention to Improve COVID-19 Vaccination Behaviors among Low-Income, Spanish-Speaking, and Immigrant Latino Parents or Caregivers	RCT	8	0.615385	Yes	No	No	No	No	Yes	Unclear	Yes	Yes	Yes	Yes	Yes	Yes
18	Prevention of dementia using mobile phone applications (PRODEMOS): a multinational, randomised, controlled effectiveness–implementation trial	RCT	8	0.615385	Yes	No	Yes	No	No	Yes	No	Yes	Yes	Yes	No	Yes	Yes
23	Satisfaction with modes of telemedicine delivery during COVID-19: A randomized, single-blind, parallel group, noninferiority trial	RCT	11	0.846154	Unclear	Yes	No	Yes	Yes	Yes	Yes	Yes	Yes	Yes	Yes	Yes	Yes
24	Telehealth Treatment of Behavior Problems in Young Children With Developmental Delay A Randomized Clinical Trial	RCT	9	0.692308	Unclear	No	Yes	No	No	Yes	Yes	Yes	Yes	Yes	Yes	Yes	Yes
25	Text2Breathe: Text-Message Intervention for Parent Communication and Pediatric Asthma	RCT	10	0.769231	Yes	Yes	No	No	Yes	Yes	Unclear	Yes	Yes	Yes	Yes	Yes	Yes
26	The moderating impact of neighborhood walkability on mHealth interventions to increase moderate to vigorous physical activity for insufficiently active adults in a randomized trial	RCT	10	0.769231	Yes	Yes	N/A	Yes	Yes	Yes	No	Yes	Unclear	Yes	Yes	Yes	Yes
27	The STAR-MAMA RCT: Bilingual Mobile Health Coaching for Postpartum Weight Loss	RCT	9	0.692308	Yes	Unclear	Yes	No	No	Yes	Unclear	Yes	Yes	Yes	Yes	Yes	Yes
31	Utility of a virtual counselor (VICKY) to collect family health histories among vulnerable patient populations: A randomized controlled trial	RCT	9	0.692308	Yes	No	Yes	No	No	Yes	Yes	Yes	Yes	Yes	No	Yes	Yes
32	Health Coaching Reduces HbA1c in Type 2 Diabetic Patients From a Lower-Socioeconomic Status Community:A Randomized Controlled Trial	RCT	9	0.692308	Yes	Yes	Unclear	No	No	Yes	No	Yes	Yes	Yes	Yes	Yes	Yes
33	Smart-Phone Obesity Prevention Trial for Adolescent Boys in Low-Income Communities: The ATLAS RCT	RCT	9	0.692308	Yes	Yes	Unclear	No	No	Yes	No	Yes	Yes	Yes	Yes	Yes	Yes
NON RCT STUDIES: COHORT
Article information			Score		Appraisal tool
ID study	Title	Study Design	Score (Max=11, n=cases of yes)		Were the two groups similar and recruited from the same population?	Were the exposures measured similarly to assign people to both exposed and unexposed groups?	Was the exposure measured in a valid and reliable way?	Were confounding factors identified?	Were strategies to deal with confounding factors stated?	Were the groups/participants free of the outcome at the start of the study (or at the moment of exposure)?	Were the outcomes measured in a valid and reliable way?	Was the follow up time reported and sufficient to be long enough for outcomes to occur?	Was follow up complete, and if not, were the reasons to loss to follow up described and explored?	Were strategies to address incomplete follow up utilized?	Was appropriate statistical analysis used?
1	A Comparison of Self-Referral and Referral via Primary Care Providers, through Two Similar Digital Mental Health Services in Western Australia.	Cohort	8	0.727273	No	Yes	Yes	Yes	Yes	No	Yes	Yes	No	Yes	Yes
10	Engagement in the Michigan Screening and Intervention for Glaucoma and Eye Health through Telemedicine Program: Comparing the Effect of Clinic versus Community-Based Recruitment Strategies.	Cohort	6	0.545455	No	N/A	Yes	Yes	No	Yes	Yes	Yes	N/A	N/A	Yes
NON RCT STUDIES: QUASI EXPERIMENTAL
Article information			Score		Bias related to temporal precedence	Selection and allocation	Confounding factors	Administration of intervention/exposure	Bias related to assessment, detection and measurement of the outcome			Participant retention	Statistical Validity
ID study	Title	Study Design	Score (Max=9, n=cases of yes)		Is it clear in the study what is the “cause” and what is the “effect” (i.e. there is no confusion about which variable comes first)?	Was there a control group?	Were participants included in any comparisons similar?	Were the participants included in any comparisons receiving similar treatment/care, other than the exposure or intervention of interest?	Were there multiple measurements of the outcome, both pre and post the intervention/exposure?	Were the outcomes of participants included in any comparisons measured in the same way?	Were outcomes measured in a reliable way?	Was follow-up complete and if not, were differences between groups in terms of their follow-up adequately described and analyzed?	Was appropriate statistical analysis used?
7	Connecting during COVID: The application of teleservices in two integrated perinatal settings.	Quasi-Experimental (pre-post)	5	0.555556	Yes	Unclear	No	Yes	No	Yes	Yes	N/A	Yes
17	My Quest, an Intervention Using Text Messaging to Improve Dietary and Physical Activity Behaviors and Promote Weight Loss in Low-Income Women.	Quasi-Experimental (pre-post)	6	0.666667	Yes	No	Yes	Yes	No	Yes	Yes	No	Yes
NON RCT STUDIES: CROSS SECTIONAL (one point in time) / LONGITUDINAL (multiple time points)
Article information			Score		Appraisal tool
ID study	Title	Study Design	Score (Max=8, n=cases of yes)		Were the criteria for inclusion in the sample clearly defined?	Were the study subjects and the setting described in detail?	Was the exposure measured in a valid and reliable way?	Were objective, standard criteria used for measurement of the condition?	Were confounding factors identified?	Were strategies to deal with confounding factors stated?	Were the outcomes measured in a valid and reliable way?	Was appropriate statistical analysis used?
11	Evaluating the Implementation of the Connect for Health Pediatric Weight Management Program	Cross-sectional	4	0.5	No	No	Yes	Yes	No	No	Yes	Yes
12	From pandemic response to portable population health: A formative evaluation of the Detroit mobile health unit program	Cross-sectional	5	0.625	No	Yes	Yes	Yes	No	No	Yes	Yes
5.1	Long-Term Effectiveness of the TIME Intervention to Improve Diabetes Outcomes in Low-Income Settings: a 2-Year Follow-Up	Longitudinal	6	0.75	Yes	Yes	Yes	Yes	No	No	Yes	Yes
14	Methodological Insights on Recruitment and Retention From a Remote Randomized Controlled Trial Examining the Effectiveness of an Alcohol Reduction App: Descriptive Analysis Study	Longitudinal	6	0.75	Yes	Yes	Yes	Yes	No	No	Yes	Yes
16	Mobile Health Technology Can Objectively Capture Physical Activity (PA) Targets Among African-American Women Within Resource-Limited Communities-the Washington, D.C. Cardiovascular Health and Needs Assessment.	Cross-sectional	6	0.75	Yes	Yes	Yes	Yes	No	No	Yes	Yes
19	Proactively Connecting Residents in Underserved and Low Socioeconomic Status Communities with "Virtual Hospital" Telehealth Access in Response to the COVID-19 Pandemic	Longitudinal	5	0.625	Yes	Yes	No	Yes	No	No	Yes	Yes
20	Recruitment of diverse community health center patients in a pragmatic weight gain prevention trial	Cross-sectional	6	0.75	Yes	Yes	Yes	Yes	No	No	Yes	Yes
21	Recruitment strategies for reaching adults aged 50 years and older with low socioeconomic status for participation in online physical activity interventions.	Cross-sectional	6	0.75	Yes	Yes	Yes	Yes	No	No	Yes	Yes
22	Retaining diverse adults with diabetes in a long-term trial: Strategies, successes, and lessons learned.	Longitudinal	6	0.75	Yes	Yes	Yes	Yes	No	No	Yes	Yes
28	Understanding the Steps Toward Mobile Early Intervention for Mothers and Their Infants Exiting the Neonatal Intensive Care Unit: Descriptive Examination	Cross-sectional	6	0.75	Yes	Yes	Yes	Yes	No	No	Yes	Yes
29	Use of telephone and digital channels to engage socioeconomically disadvantaged adults in health disparities research within a social service setting: Cross-sectional study	Cross-sectional	8	1	Yes	Yes	Yes	Yes	Yes	Yes	Yes	Yes
30	Using Telehealth to address disparities in cognitive, language, and emotion regulation problems in young children: A case illustration using the INvesT model	Cross-sectional	5	0.625	Yes	Yes	Yes	No	No	No	Yes	Yes
