# Supplementary material for: A systematic literature review to identify delivery strategies of digital health for low SEP populations
Source: Research Square preprint supplement (doi:10.21203/rs.3.rs-8659891/v1), 2026-02-02
Supplement: Supplementary file 2 [file 200a06bc69bf1acae9ff3427.xlsx]

## Sheet: Description articles
Bibliographic information					E-health application / E-health support service			Context				Intervention: delivery strategy												Population							Authors' reflections upon delivery strategies
Study ID paper	First author	Title	Year of publication	doi	E-health application / E-health support service	E-health type	Primary health outcome	Type of study	Delivery strategy described/evaluated	Country of research context	Research setting description	Scientific or experiential underpinning used (yes/no, if yes, experiental/scientific/experiential and scientific)	Description scientific or empirical underpinning	Sources scientific underpinning ((type of scientific underpinning: theory (name theory), scientific publications, prior research author), (focus: implementation, delivery, incentivization, or advertisement), doi or citation).	Summary delivery strategy	Category stakeholders (research, healthcare, education, social services, community, commercial, citizens)	Stakeholders' role (what do they provide where?)	Means of recruitment	Category recruitment strategy (place, point of contact, promotion, facilitation, incentive) Place (X)	Point of Contact (X)	Promotion (X)	Facilitation (X)	Incentive (X)	SEP selection criteria (individual, area, clinic)	Description target population	Inclusion criteria of study population	Exclusion criteria of study population	Information available of SEP category (education, income, neighborhood)	Number of participants at baseline (total number of participants included in the study, unless stated otherwise)	Demographic data on socio-economic position variables. Demographics are based of the total no. of participants stated at "Number of participants at baseline" unless stated otherwise	Authors' additional reflections on delivery strategies
1	Staples LG	A Comparison of Self-Referral and Referral via Primary Care Providers, through Two Similar Digital Mental Health Services in Western Australia	2022	10.3390/ijerph19020905.	E-health application	Web applications	Mental health	Observational cohort study	Evaluated	Australia	Western Australia	No	N/A		Two mental health websites, PORTS and MindSpot, provide similar assessment and treatment options, and both are publicly funded and therefore free to patients. PORTS is only accessible via referral and designed for disadvantaged patients. Physicians are trained to identify disadvantages patients for referral. MindSpot is accessible via self-referral.	Healthcare	General practicioner: Face-to-face referral (point of contact) Patient: self-referral	Referral, self-referral		X				Individual	Adults living in Western Australia suffering from depression	PORTS: People are eligible for PORTS if they are a resident of WA, aged 16 years or older, and are facing disadvantages. Individuals are referred to PORTS by their General Practitioner (GP) or by an approved health practitioner. MindSpot: People are eligible for MindSpot if they are 18 years or over, and an Australian resident eligible for publicly funded health services. MindSpot is a national s…	PORTS: People are ineligible if they require urgent support, for example, because of imminent suicidal intent or acute psychosis. People requiring immediate or high-intensity support are triaged and on-referred to a more appropriate service, such as an acute crisis service high intensity service.	Education, income, neighborhood	Total: 9002 PORTS: 4848 MindSpot: 4154	PORTS n=4848 Education Postgraduate degree 5.9% (156/2644) Undergraduate degree 11.7% (310/2644) Other tertiary qualification 33.4% (883/2644) No tertiary qualification 49.0% (1295/2644) Employment Employed full or part-time 42.2% (1116/2644) Unemployed 16.0% (423/2644) Other 41.8% (1105/2644) IRSD (Statistics Index of Relative Socio-economic Disadvantage) First quintile (most disadvantaged) 16.1…
2	Steinberg DM	Adherence to Self-Monitoring via Interactive Voice Response Technology in an eHealth Intervention Targeting Weight Gain Prevention Among Black Women: Randomized Controlled Trial	2014	10.2196/jmir.2996	E-health application	Telehealth	Weight	RCT	Described	USA	Six community health clinics. Patients are predominately racial/ethnic minority (77%), 98% are <200% of the federal poverty level, and most are either uninsured, underinsured, or hold public insurance (59% uninsured, 31% Medicaid/Medicare)	No	N/A		Health staff identified potential patients via electronic healthcare record. Invitation letters and study brochures were mailed via postal mail. Patients were called for participation after one week after post was sent.	Healthcare, research	Respective health center medical director and the study principal investigator: sending signed invitation letters Research staff: study staff called potentially eligible patients to invite participation, perform an initial eligibility assessment, and schedule a screening evaluation visit.	Invitation letters, brochures, location clinic, clinic type, 12-month gym membership	X	X	X		X	Clinic	FQHC enrolled overweight black female patients	Black women, aged 25 to 44 years, with a BMI of 25-34.9 kg/m2. Additional inclusion criteria are: at least one visit to a Piedmont Health center in the prior 24 months, North Carolina residency, and the ability to read and write in English	Exclusion criteria include: current pregnancy, being ≤ 12 months postpartum, a history of myocardial infarction or stroke in the prior two years, and profound cognitive, developmental or psychiatric disorders.	Education, income	194, intervention: 97, control: 97	Education Less than high school graduate 19 (10.0) High school graduate or GED 45 (23.8) Some college or vocational/trade school 83 (43.9) Associate degree 26 (13.8) College graduate or post graduate degree 13 (6.9) Unknown 3 (1.6) Annual household income Under $10,000 - $29,999 139 (73.5) $30,000 - $39,999 24 (12.7) Over $40,000 24 (12.7) Unknown 2 (1.1)
3	Kling SM	Advanced Health Information Technologies to Engage Parents, Clinicians, and Community Nutritionists in Coordinating Responsive Parenting Care: Descriptive Case Series of the Women, Infants, and Children Enhancements to Early Healthy Lifestyles for Baby (WEE Baby) Care Randomized Controlled Trial	2020	10.2196/22121	E-health application	EHRe	Weight	RCT	Described	USA	Pediatric clinics located in Luzerne County of northeastern Pennsylvania. This area is characterized as Medically Underserved with shortages in Health, Dental, and Mental Health Professionals and having a diversity of population densities including both urban and rural municipalities. Data derived from electronic medical records at Geisinger describing pediatric patients in Luzerne County reveale…	No	N/A		Four recruitment strategies were used. 1. Potential participants were identified via the electronic health records, research staff approached potential patients in the labor and delivery unit. 2. Potential participants were identified via the electronic health records, flyers were distributed by research staff in the pediatric clinic during the well-child visit. Mothers were called for participat…	Healthcare	Clinic staff: recruitment in labor unit after labor, recruitment calls for mothers that have an WIC appointment planned	In-person recruitment, phone call recruitment, clinic type, flyer, social media advertisement	X	X				Clinic	Mothers who are eligible to receive publicly funded childcare	Eligible dyads met the following inclusion criteria: full-term (≥37 weeks gestation) infant, singleton newborn, English-speaking mother between 18 and 55 years old, intention to receive well-child care at a participating pediatric clinic, and eligibility to be enrolled in or current enrollment in WIC.	Mother-infant dyads are excluded if there is a plan for the newborn to be adopted, if the mother anticipates switching to a non-participating provider within 6–9 months, if the mother-infant dyads do not live in the service area of the participating WIC clinics, if the newborn’s birth weight is < 2500 g, or if either mother or infant has significant health issues that would affect study participa…	Education, income	288, intervention: 131, control: 157	ONLY intervention group (n=131) Annual household income (US $), n (%) <10,000 28 (22.6) 10,000-24,999 52 (41.9) 25,000-49,999 30 (24.2) 50,000-74,999 3 (2.4) Do not know 8 (6.5) Refuse to answer 3 (2.4) Education, n (%) Some high school or less 13 (10.5) High school graduate 60 (48.4) Some college 41 (33.1) College graduate 9 (7.3) Graduate degree or greater 1 (0.8)
4	Garg A	A Social Care System Implemented in Pediatric Primary Care: A Cluster RCT	2023	10.1542/peds.2023-061513	E-health application	EHR	Social needs	RCT	Evaluated	USA	Eight community health clinics in the Boston HealthNet network	No	N/A		Health staff was trained to distribute social needs screening instrument during well-child visit. Physicians referred patients to community resources available in patients' electronic health records and if needed to a patient navigator. Patient navigator supports patients in accessing online community resources.	Healthcare	Clinic staff: Collecting data on social needs and referral to resources (in EHR) to help patients OR referral to patient navigator, someone who can help patients access EHR social resources (Point of contact, place-> low SEP environment) Support service: (facilitation) A peer patient navigator was made available to meet with families, inquire about needs, and assist families with completing appli…	Referral, free support social needs, location clinic, type clinic	X	X		X	X	Clinic, individual	Medicaid-insured healthy low-income children	All parent-child dyads who presented for a newborn visit to participating CHCs between September 2015 and March 2017 were eligible. Since our study population included healthy low-income children insured by Medicaid at baseline.	Families were excluded if the newborn had a history of prematurity (ie, born before 32 weeks), had commercial insurance, or was born with a chronic disease (eg, cardiac disease) or with Neonatal Abstinence Syndrome. Newborns living with foster parents were also excluded.	Income	878, intervention: 524, control: 354	All were medicaid insured	Authors' reflection delivery strategy: Beyond poor implementation, there are likely other factors that led to our unexpected results. Because of funding, we only had 1 patient navigator serving 3 clinics, which limited her on-site presence. We previously reported that clinicians were more likely to refer families if the navigator was on site. Authors' reflection implementation : Qualitative work …
5	Vaughan EM	A Telehealth-supported, Integrated care with CHWs, and MEdication-access (TIME) Program for Diabetes Improves HbA1c: a Randomized Clinical Trial	2020	10.1007/s11606-020-06017-4	E-health application	Mobile application	Diabetes	RCT	Described	USA	A nonprofit clinic in Houston, Texas. Clinic eligibility included uninsured individuals earning < 250% of the federal poverty level.	Yes, scientific	To address the issue of participant retention in low-income settings TIME included several strategies including establishing an efficient tracking system, CHW training to identify participant barriers, and room setup with intentional socialization periods arranged to promote a welcoming environment Meals, childcare, in-class laboratory, and medication refills also were provided MEdication-access.…	Scientific publication, delivery, doi: 10.1177/009286150904300411. Prior research author, delivery, doi: 10.2174/1573399814666181112145910.	Recruitment of potential patients occurred via clinic database (primary), clinic referrals, or word of mouth. Eligible patients were selected from the electronic health record and contacted by phone for participation.	Healthcare, research	CHW: recruitment patients, providing meetings and available for contact via encripted app (point of contact). CHW provided education to the patients on how to use the encripted app OhMD (faciltation). Trained to identifiy barriers of patients (facilitation). Study Physician: prescribing affordable drugs (incentive) Non-profit clinic (place)	Referral, phone call recruitment, word of mouth, free food, free healthcare, clinic type	X	X		X	X	Clinic	Non-profit clinic enrolled Latino adults with type 2 diabetes	Clinic eligibility included uninsured individuals earning < 250% of the federal poverty level. Eligible participants were adults (> 18 years) with type 2 diabetes (HbA1c >6.5%), self-identified as Latino(a), and Spanish-speaking	Individuals were excluded if they were pregnant, had an event that would alter HbA1c levels (e.g., recent blood transfusion), or did not attend at least one group visit.	Income	89, intervention: 44, control: 45	All participants were under the 250% poverty level
5.1	Vaughan EM	Long-Term Effectiveness of the TIME Intervention to Improve Diabetes Outcomes in Low-Income Settings: a 2-Year Follow-Up	2022	10.1007/s11606-021-07363-7	E-health application	Mobile application	Diabetes	Longitudinal, secondary analysis RCT	Described	USA	Nonprofit, community clinics that served only uninsured and low-income individuals earning ≤ 150% of the federal poverty level. Individuals who were insured or earned greater than the allotted income were not eligible for clinic services.	No	N/A		Recruitment of potential patients occurred via clinic database (primary), clinic referrals, or word of mouth. Eligible patients were selected from the electronic health record and contacted by phone for participation.	Healthcare, research	CHW: provide care, use the app, Medical provider: referral to program (point of contact) Research team: recruitment (point of contact) Clinic: location where low SEP is visiting (place)	Referral, phone call recruitment, word of mouth, free food, free healthcare, clinic type	X	X				Clinic	Non-profit clinic enrolled Latino adults with type 2 diabetes	Study inclusion criteria were adults ≥ 18 years, Latino(a)s, type 2 diabetes (HbA1c ≥ 6.5%), and Spanish-speaking.	Individuals were excluded if they did not attend at least one group visit (n = 0); were pregnant (n = 1); had severe cognitive impairment (n = 0); required frequent provider encounters, e.g., for labile glucose levels (n = 1); or had a treatment or condition that could alter reliable HbA1c measurements (n = 2).16	Income	101	Employment (n, (%)) Domestic 45 (44.6) Manual labor 23 (22.8) Food service 12 (11.9) Unemployed 14 (13.9) Other/unknown 7 (6.8)
6	Heisler M	Comparison of community health worker-led diabetes medication decision-making support for low-income Latino and African American adults with diabetes using e-Health tools versus print materials: A randomized controlled trial	2014	10.7326/M13-3012.	E-health application	Mobile application	Diabetes	RCT	Described	USA	The Community Health and Social Services Center (CHASS), a federally qualified health center in Southwest Detroit serving over 13,000 patients with 47,099 visits in 2012. 60% of the community served by CHASS are Spanish-speaking Latinos with an annual median household income of approximately $20,000 and high rates of diabetes and obesity. 35% are African Americans of similar conditions.	No	N/A		Eligible patients were selected via the electronic health record. Patients were sent introductory letters via postal mail and were followed-up for participation via phone call.	Healthcare, research	Community Health and Social Services Center (CHASS) (place) Research staff: recruitment (point of contact), stipend (incentive)	Invitation letters, phone call recruitment, 20$ stipend after each assessment, location clinic, clinic type	X	X			X	Clinic	FQHC enrolled patients with type 2 diabetes	Inclusion criteria required A1c of >7.5% in the prior six months or expressed concerns about current diabetes medications during the screening assessment.	Exclusion criteria were age less than 21 years, terminal health conditions, self-reported alcohol or drug abuse, and conditions (e.g., blindness, dementia) that would impede meaningful participation. Pregnant women and individuals who reported that they could not be contacted by phone were also excluded.	Education, income	188, 93 intervention, 95 control	Intervention: Unemployment status: not working %: 68 Education: less than high school, %: 39 Annual income, %: <15000: 59 >15000: 16 Prefer not to say: 25 Control: Unemployment status: not working %: 64 Education: less than high school, %: 65 Annual income, %: <15000: 61 >15000: 17 Prefer not to say: 22
7	Ehmer AC	Connecting during COVID: The application of teleservices in two integrated perinatal settings	2021	10.1002/imhj.21958	E-health application	EHR, video communication	Mental health	Before-and-after study, quasi-experimental design	Evaluated	USA	HEART clinic: A dyadic medical home for adolescent postpartum women under the age of 25 and their children. HEART serves a racially and ethnically diverse patient population, with over 85% of patients publicly insured; public insurance is available to low-income individuals and families whose income is below federally set guidelines. Approximately 20–30 newborns and their mothers are enrolled in …	No	N/A		HEART program: clinic set-up devices and private rooms at the clinic for patients to participate in videoconsultations. Patients were called to reschedule appointments. PROMISE clinic: patients were called to reschedule their appointments to videoconsultations and provided instructions.	Healthcare	HEART: Clinicians: rescheduling appointments via call (point of contact) Young Mothers Clinic: providing spaces with devices according to COVID guidelines (facilitation), environment were low SEP patients can be recruited (place) PROMISE: Clinicians : rescheduling appointments, providing instructions (point of contact, facilitation) Medical providers: EMR Referral to PROMISE (point of contact)	Phone call recruitment, referral, facilitation of space and devices for e-health use, location clinic, clinic type	X	X		X		Clinic	Postpartum women and their children	Pre COVID: Perinatal adolescent mothers who were up to 6 months postpartum that were seen between September 1, 2019 and February 29, 2020. During COVID: Perinatal adolescent mothers who were up to 6 months postpartum who were seen between April 1, 2020 and September 30, 2020	HEART: For the purpose of the current study, data were only included for adolescent women who were up to 6 months postpartum during the study period.	Income	HEART: 74, before: 33, after: 41 PROMISE: 1195, before: 397, after: 798	HEART: Insurance before Public 26 (78.8) Uninsured 3 (3.0) Insurance after Public 31 (75.6) Uninsured 4 (9.8) PROMISE: Insurance before Public 232 (58.4%) Insurance after Public 421 (52.8%)
8	Pyne JM	Cost Effectiveness of On-site versus Off-site Depression Collaborative Care in Rural Federally Qualified Health Centers	2015	10.1176/appi.ps.201400186.	E-health application	Web application, video communication	Mental health	RCT	Described	USA	Federally qualified health care center. Three-quarters of FQHC patients live in poverty, half live in rural areas, one-third are uninsured, and two-thirds are members of racial/ethnic minority groups.	No	N/A		Screening for depression and enrollment into the program via primary care physician.	Healthcare, research	(On-site) Physician (Place, point of contact): referral Psychiatrist (point of contact): video consultation for medication	Referral, location clinic, clinic type	X	X				Clinic	FQHC enrolled patients suffering from depression	From 2007-2009, 19,285 patients were screened for depression, 14.8% (n=2,863) screened positive (PHQ9≥10) and 364 were enrolled.	We excluded patients that primary care providers would not be comfortable treating; exclusion criteria included pregnancy, schizophrenia, acute suicidal ideation, substance dependence, bipolar disorder, recent bereavement, and current specialty mental health treatment. We also excluded patients who were unable to participate in research because of cognitive impairment, having a court-appointed gu…	Education, income, neighborhood	364, intervention: 179, control: 185	Only patients with at least one research follow-up visit were included in the analyses. Total: n=332 Income n(%) < $10,000 95 (29.6) $10,000 - $15,000 76 (23.7) $15,000 - $20,000 51 (15.9) $20,000 - $30,000 56 (17.5) $30,000 - $40,000 23 (7.2) $40,000 - $50,000 12 (3.7) >$50,000: 8 (2.5) High school graduate: 245 (74.0) Employed: 122 (36.9) Insurance Public insurance 100 (30.1) Private insurance …
9	Bennett GG	Effectiveness of an App and Provider Counseling for Obesity Treatment in Primary Care	2018	10.1016/j.amepre.2018.07.005.	E-health application	Telehealth, wearable	Weight	RCT	Described	USA	A private, nonprofit community health system. Patients are predominantly racial/ethnic minority (70%); impoverished (96% are <200% of the federal poverty level); and either uninsured (45%) or hold public insurance (32% Medicaid/State Children’s Health Insurance Program).	No	N/A		Eligible patients were selected via the electronic health record. Patients were sent introductory letters via postal mail and were followed-up for participation via phone call.	Healthcare, research	Piedmont: information letter(point of contact), brochure (promotion), recruitment location for low SEP (place) Study: cellular scale (incentive), phone call	Invitation letter, brochure, location clinic, type clinic, free scale	X	X	X		X	Clinic	Patients enrolled in a private non-profit healthcare facility with obesity and elevated risk of diabetes and cardiovascular disease	Patients with a BMI of 30.0–44.9 and the aforementioned diagnoses (captured via ICD-9 codes). Additional inclusion criteria were as follows: at least two visits to the health center in the last 12 months, English fluency, ownership of a mobile phone, and willingness to send/receive three to nine text messages per week.	Exclusion criteria included pregnancy or ≤ 12 months postpartum, cohabitation with another participant, participation in a related trial, or plans to move outside of the region within 2 years. The trial also excluded participants with a cardiovascular event in ≤ 6 months; a condition/medication that would affect weight; profound cognitive, developmental, or psychiatric disorders; or psychiatric h…	Education, income, neighborhood	351, intervention: 176, usual care: 175	Education Less than high school graduate 51 (15) High school graduate or GED 125 (36) Some college or vocational/trade school 139 (40) 4-year college degree or higher 36 (10) Annual household income 0–$11,999 70 (20) $12,000–$24,999 110 (31) $25,000–$34,999 56 (16) $35,000–$49,999 46 (13) ≥ $50,000 26(7) Unknown or unreported 43 (12) Living under 2014 U.S. Census poverty threshold Below 104 (30) …
9.1	Foley P	Track: A randomized controlled trial of a digital health obesity treatment intervention for medically vulnerable primary care patients	2016	10.1016/j.cct.2016.03.006.	E-health application	Telehealth, wearable	Weight	RCT	Described	USA	Four federally-qualified community health centers. Patients are predominately racial/ethnic minority (70%), impoverished (96% with income 200% of the federal poverty level), and most are either uninsured, underinsured, or hold public insurance (45% uninsured, 32% Medicaid/S-CHIP, 6% Medicare).	No	N/A		Eligible patients were selected via the electronic health record. Patients were sent introductory letters that were signed by the health center medical director and study principle investigator via postal mail. Potential participants were followed-up for participation via phone call.		Piedmont: information letter (signed) (point of contact), brochure (promotion), place to recruit low SEP (place) Study: signed invitation letter , cellular scale (incentive), phone call (point of contact)	Invitation letter, brochure, location clinic, type clinic, free scale	X	X	X		X	Clinic	Patients enrolled in a private non-profit healthcare facility with obesity and elevated risk of diabetes and cardiovascular disease	Participants include 351 men and women, aged 21 to 65 years, with a BMI of 30.0-44.9 kg/m2 and a weight ≤ 330 pounds (the weight limit for the digital scales used in the intervention) and a current diagnosis of hypertension, type 2 diabetes, and/or hyperlipidemia. Additional inclusion criteria are: at least two visits to a participating Piedmont center in the prior 12 months, North Carolina resid…	Exclusion criteria include: current pregnancy, being ≤ 12 months postpartum, cohabitation with another study participant, current employment by Piedmont, current participation in another obesity treatment study or a study involving physical activity, high blood pressure, diabetes, or high cholesterol, or plans to move outside of the study region within the next two years. Participants must not ha…	Education, income, neighborhood	351, intervention: 176, usual care: 175	Education Less than high school graduate 51 (15) High school graduate or GED 125 (36) Some college or vocational/trade school 139 (40) 4-year college degree or higher 36 (10) Annual household income 0–$11,999 70 (20) $12,000–$24,999 110 (31) $25,000–$34,999 56 (16) $35,000–$49,999 46 (13) ≥ $50,000 26(7) Unknown or unreported 43 (12) Living under 2014 U.S. Census poverty threshold Below 104 (30) …
10	Elam AR	Engagement in the Michigan Screening and Intervention for Glaucoma and Eye Health through Telemedicine Program: Comparing the Effect of Clinic versus Community-Based Recruitment Strategies	2023	10.1016/j.ogla.2022.10.006.	E-health application	EHR, web application	Glaucoma	Prospective cohort study (Secondary analysis RCT)	Evaluated	USA	Two community-based health care facilities, the Hope Clinic, a free clinic in Ypsilanti, Michigan, and the Hamilton Community Health Network, a federally qualified health center (FQHC) in Flint, Michigan. Participants are also being recruited from the wider Ypsilanti and Flint communities through outreach guided by the Community Advisory Board.	Yes, experiential and scientific	In a prior qualitative study,15 30 key stakeholders including clinic administrators, staff, providers, and patients were interviewed to assess opinions about best practices, including barriers to and facilitators of glaucoma screening and eye care implementation in the 2 clinics. Participants from these interviews were invited to participate on the longitudinal Community Advisory Board that meets…	Prior research author, delivery, doi: 10.1097/IJG.0000000000001756.	Clinic-based outreach (physician referral to the eye clinic, phone call from study staff based off of a clinic list, or a flyer or brochure seen in the medical clinic) Community-based outreach (nonmedical staff referrals, heard about it from a friend, a community flyer, the clinic website, or social media). Community flyers included bus advertisement, cable advertisement, food pantry flyer, denta…	Healthcare, social services, community, citizens	FQHC (Place, point of contact): Referral, brochure Free Clinic (Place, point of contact): Referral, brochure M-SIGHT program staff (Point of contact, promotion): recruitment telephone call FQHC diabetes patients, advertisement through television, radio, flyers at social housing, church, food pantries, and senior apartment buildings, bus stop advertisement, social media campaign. Social Services p…	Referral, in person recruitment, phone call recruitment, social media, offline advertisement, word of mouth, location clinic, clinic type	X	X	X			Clinic	Adults enrolled in a free clinic or FQHC	Anyone ≥ 18 years of age and enrolled in FQHC or Free clinic	Exclusion criteria include: (1) significant eye pain (Likert scale ≥ 8 out of 10); (2) sudden decrease in vision within 1 week; (3) binocular diplopia (double vision in both eyes); (4) cognitive impairment; (5) pregnancy; (6) incarceration; or (7) planning to move outside of driving distance to the clinic within the next 6 months.	Education, income, neighborhood	647, free clinic: 356, FQHC: 291	Education Total < High school 69 (10.9) High school + 563 (89.1) Free clinic < High school 37 (10.7) High school+ 309 (89.3) FQHC < High school 32 (11.2) High school + 254 (88.8) Income Total ≤ $29 999 396 (73.5) $30 000 + 143 (26.5) Free clinic ≤ $29 999 203 (71.2) $30 000 + 82 (28.8) FQHC ≤ $29 999 193 (76.0) $30 000 + 61 (24.0) Insurance Total No 187 (29.9) Yes 439 (70.1) Free clinic No 165 (4…	Authors' reflection delivery strategy: Our Community Advisory Board suggested clinic-specific and community-specific outreach strategies, thus our mode of engagement significantly differed between the 2 sites. At the FQHC, our team was asked to reach out and call all people with diabetes who were overdue for their eye screening, so participants at the FQHC were more likely to hear about the MI-SI…
11	Simione M	Evaluating the Implementation of the Connect for Health Pediatric Weight Management Program	2024	10.1001/jamanetworkopen.2023.52648	E-health application	Telehealth, web application	Weight	Cross sectional study, secondary analysis RCT	Evaluated	USA	Health care organizations that predominately care for children from low-income communities: Denver Health in Denver, Colorado; Massachusetts General Hospital (MGH) in Boston, Massachusetts; and Prisma Health in Greenville, South Carolina. They were selected because they had pediatric or family medicine practices based in hospitals, federally qualified health centers or community health centers, s…	Yes, experiential and scientific	Prior to implementing the program, we engaged stakeholders (including families, clinicians, and hospital leadership) to adapt the program and refine the implementation strategies guided by the Consolidated Framework for Implementation Research. The implementation strategies to facilitate the adoption of the program were based on the Expert Recommendations for Implementing Change, designed to prom…	Theory: Consolidated Framework For Implementation Research (CFIR) , implementation, https://doi.org/10.1186/1748-5908-4-50 Scientific publication: Expert Recommendations for Implementing Change, implementation, doi: 10.1186/s13012-015-0209-1 Prior research author, delivery doi:10.1186/s43058-020-00047-z	During well-child visits health staff would receive a Best Practice Alert (BPA) if an elevated BMI was identified in patients. Enrollment of patients in text-message based support and online educational materials was the follow-up. Denver Health used an team-based care approach where the physician and the medical assistants received BPA's and managed the enrollment in online and text-based suppor…	Healthcare	Clinic staff: referral after getting flagged by the Connect for Health program (point of contact) Clinics: located in low SEP neighborhoods, target low SEP groups (Place)	Referral, location clinic, clinic type	X	X				Clinic	Parents of children ages 2-12 years with elevated BMIg, enrolled in a FQHC, community health center or family medicine practice	Children aged 2-12 with elevated BMI. Each organization defined an elevated BMI as being in the 85th percentile or greater (Denver, MGH) or in the 95th percentile or greater (Prisma Health). Implementation periods were December 2019 to April 2021 at Denver Health, December 2019 to April 2022 at MGH, and November 2019 to April 2022 at Prisma Health.	N/A	Income	18333 patients screened and diagnosed, Denver Health: 8480 [46%], MGH: 6190 [34%], Prisma Health: 3663 children [20%]	Child sociodemographic characteristics, n(%) Public insurance: Denver: 7657/8480 (90.3) MHG: 3983/6190 (64.4) Prisma: 516/3663 (14.1) (75.9% of patients did not have a record)	We also found variation in the uptake of the EHR tools among the health care organizations throughout the implementation period. Denver Health’s high uptake was likely due to their approach of having medical assistants primarily interact with the tools.MGHand Prisma Health had physicians interact with the tools, and their uptake is consistent with the literature regarding the adoption of clinical…
12	Levy P	From pandemic response to portable population health: A formative evaluation of the Detroit mobile health unit program	2021	10.1371/journal.pone.0256908	E-health application	Telehealth	COVID19	Cross sectional study	Evaluated	USA	Site selection for mobile health unit (MHU) deployment was initially based on publicly available COVID-19 data. Later as the MHU program expanded, we increasingly relied on real-time data collected onsite. We began using data provided by the PHOENIX program to target high-risk communities based on emerging evidence that patients from areas with increased social vulnerability might disproportionat…	No	N/A		Location of mobile health unit was initially decided based upon prevalence of COVID-19 to increase the likelihood of testing and providing digital care to those infected with COVID-19. Later on, the location of the mobile health unit was determined based upon COVID-19 prevalence, socioeconomic status of the area and chronic disease burden, to increase the likelihood of providing care to those who…	Healthcare, research, commercial, community	PHOENIX: provide insight into the most vulnerable population locations Healthcare workers: driving the van (place, facilitation, promotion), executing the delivery. FORD; providing vans with WIFI (incentive) Community partners: support project (promotion)	The van located where most vulnerable people live, promotion on the van, support with digital health use, free Wi-Fi	X		X	X	X	Area	People living in areas with increased social vulnerability	N/A	N/A	Neighborhood	32523	Population reached living in vulnerable communities (%) Drive through: 25% Mobile unit: 27% Data driven location + mobile unit: 41%
13	Smithers LG	In‑person versus electronic screening for social risks among carers of pediatric inpatients: A mixed methods randomized trial	2024	10.1007/s00431-024-05470-1	E-health application	Mobile application	Social needs	RCT	Described	Australia	The Northern Adelaide Local Health Network (NALHN), South Australia. The main NALHN hospital is in one of the most disadvantaged areas of any Australian city, with higher unemployment and housing stress than other metropolitan areas.	No	N/A		Ward staff in the childrens' ward alerted research staff when admissions aged ≤ 5 years came in. Research staff informed the caregivers about the study and introduced them to the online social risk screening.	Healthcare	Ward: location where low SEP population can be recruited (place). Ward staff: in person recruitment (point of contact)	Location clinic, in person recruitment	X	X				Clinic	Parents at the children’s ward	Inclusion criteria were adult (≥ 18 years old) parents or legal guardians of a child aged ≤ 5 years admitted to the Children’s Ward.	Exclusion criteria were participating in the trial during previous admissions and inability to communicate in English.	Neighborhood, education	386, intervention: 193, control: 193	Intervention (n=193) IRSAD quintile, n (%) Quintile 1 (most disadvantaged) 119 (61.7) Quintile 2 26 (13.5) Quintile 3 28 (14.5) Quintile 4 19 (9.8) Quintile 5 (most advantaged) 0 (0.0) Not reported 1 (0.5) Highest level of school completed, n (%) Year 10 or lower 24 (12.4) Year 11 40 (20.7) Year 12 129 (66.8) Enrollment in high education, n (%) Yes 137 (71.0) No 54 (28.0) Not reported 2 (1.0) Con…
14	Oldham M	Methodological Insights on Recruitment and Retention From a Remote Randomized Controlled Trial Examining the Effectiveness of an Alcohol Reduction App: Descriptive Analysis Study	2024	10.2196/51839	Alcohol consumption	Mobile application	Alcohol consumption	Longitudinal, secondary analysis RCT	Evaluated	United Kingdom	United Kingdom	Yes, experiential and scientific	In line with previous research, and to maximize follow-up rates, we offered substantial financial incentives to complete follow-up surveys, including an additional amount for completing the primary outcome within the first 24 hours, and undertook a comprehensive follow-up approach by sequentially sending follow-up reminders through email, SMS text messages, and telephone and by post. Advertisemen…	Scientific publication, delivery, doi: 10.2196/10351	A multi‐pronged strategy including: an advertisement on the NHS website; a mail out to a database of UK based users of the Smoke Free app; and press releases and local advertising through health care providers and/or national and local government colleagues, untargeted and targeted (at men) social media advertisements and radio advertisements on Talk Radio, Asian Sounds (in English and Urdu), and…	Healthcare, research, commercial government	NHS: promotion on website (promotion,) Smoke Free App: e-mail to all UK based users (promotion) Health care providers: advertisement (promotion), point of contact as being health care professional (point of contact) National/local government bodies: advertisement (promotion), point of contact as being government (point of contact) Study: targeted and untargeted social media campaign (promotion), …	Targeted and untargeted social media advertisements, advertisement through governmental and health organizations, radio, television, e-mail recruitment of users smoking cessation application, technical support, gift vouchers of up to £36		X	X	X	X	N/A	Adults in the UK who want to drink less	Participants were eligible if they were aged 18 years or older, lived in the United Kingdom, were increasing-and-higher-risk drinkers (AUDIT score ≥8) [19], had access to an iOS device (iPhone, iPod touch, or iPad), and wanted to drink less alcohol.	N/A	Income	5602	Occupation, n (%) ABC1 4151 (74.01) C2DE 1451 (25.9) ABC1: managerial, professional, and intermediate occupations. C2DE: skilled, semiskilled, unskilled manual, and lowest-grade worked or unemployed.	Key take aways: Recruitment • Use a range of recruitment methods. • Monitor the demographic composition of the sample during trials and have targeted methods for underrecruited groups. • Targeted advertising on social media or radio can be successful in recruiting men and can yield large numbers of responses. Having advertisements run consecutively for weeks seemed to result in cumulative benefit…
15	Castellon-Lopez YM	MivacunaLA (MyshotLA): A Community-Partnered Mobile Phone Intervention to Improve COVID-19 Vaccination Behaviors among Low-Income, Spanish-Speaking, and Immigrant Latino Parents or Caregivers	2024	10.3390/vaccines12050511	E-health application	Web application	COVID19	RCT	Described	USA	Low-income and predominantly latino communities in East and South Los Angeles	Yes, experiential	Through a community-partnered approach, we sought to develop a family-centered intervention to increase COVID-19 vaccinations among Spanishspeaking Latinos.		Staff and parent leaders affiliated from seven Latino-serving community organizations recruited participants for the study. Informational sessions with parents from the Facebook group “Our Voice/Nuestra Voz” were hosted and flyers posted on Facebook and Twitter.	Community, research	Parent leaders affiliated with seven Latino-serving community organizations: in person recruitment (point of contact), provide help with recruitment by support parents in filling in the digital screening survey (facilitation) Research staff: in-person recruitment, provide support digital screening, host information sessions (place, facilitation), spread flyers online (promotion)	In-person recruitment, online promotion, support with online screening, flyers, information sessions, 40$ gift card	X	X	X	X	X	Area	Latino parents and caretakers of minors living in areas with low vaccine uptake	Adult parent or caregivers were eligible for inclusion if they (1) self-identified as Latino/a, (2) were 18 years or older, (3) had at least one unvaccinated child of any aged 17 years or younger, and (4) had the means to receive text messages and review educational material online, such as a text-capable mobile phone with a web browser and internet access. Participants could also receive our pro…	N/A	Education, income	366	Demographics only available for those who finalized the study (n=246) Not completed high school (46%) Household incomes under USD 25,000/year (73%) No health insurance (36%)
16	Thomas S	Mobile Health Technology Can Objectively Capture Physical Activity (PA) Targets Among African-American Women Within Resource-Limited Communities—the Washington, D.C. Cardiovascular Health and Needs Assessment	2016	10.1007/s40615-016-0290-4	E-health application	Wearable	Physical activity	Cross-sectional study	Described	USA	In churches from resource-limited communities in Washington D.C., particularly wards 5, 7, and 8 of the eight D.C. wards. These three wards have a higher obesity prevalence and lower median household income as compared to the remaining five wards that comprise Washington D.C.	Yes, experiential and scientific	As a CBPR study, this project engaged community members at each stage of study design and coordination. To consult on planning, implementation, and data dissemination for the assessment, our research team partnered with a community advisory board (CAB) or the D.C. Cardiovascular Health and Obesity Collaborative (D.C. CHOC) comprised of a diverse group of community leaders, church leaders, and coi…	Prior research author, delivery, doi: 10.2196/mhealth.4489	Participants were recruited at churches and at health-related community events in the targeted areas.	Community	Churches: in low SEP neighborhoods (place), recruitment in church (promotion, point of contact), facilitation of training and data registry location, additional support (super-user) (facilitation) Health-related community events: recruitment (point of contact, promotion) Study staff: availability PA trackers (incentive), providing training in mhealth use (facilitation)	In-person recruitment, promotion in church and health events, incentive via physical activity trackers, training in m-health use and technical support, recruitment and intervention in local church in low SEP area	X	X	X	X	X	Area	Church attending adult African-American women living in areas with high poverty	Participants attended one of the participating churches, were aged 19–85, and possessed sufficient English language proficiency to carry out study tasks.	N/A	Education, income	78	All participants lived in low socio-economic neighborhoods. Education, n(%) <High school 7 (9) High school 9 (12) Some college 26 (34) college 35 (45) Yearly household income, N(%) <$60,000 31 (40) $60,000–99,999 24 (31) $100,000+ 11 (14)
17	Griffin JB	My Quest, an Intervention Using Text Messaging to Improve Dietary and Physical Activity Behaviors and Promote Weight Loss in Low-Income Women	2018	10.1016/j.jneb.2017.09.007	E-health application	Telehealth	Weight	Pre-post test study (quasi-experimental study)	Described	USA	The Supplemental Nutrition Assistance Program (SNAP) office, the Department of Housing and Urban Development, and the Alabama Food Bank. A total of 55 Alabama counties (84% rural) with high rates of poverty, overweight/obesity, and chronic diseases.	No	N/A		Extension agents used a standardized recruitment script to recruit a convenience sample at the following locations: the Supplemental Nutrition Assistance Program (SNAP) office, the Department of Housing and Urban Development, and the Alabama Food Bank.	Community, government	The Supplemental Nutrition Assistance Program (SNAP) office, the Department of Housing and Urban Development, and the Alabama Food Bank (place): low SEP population can be recruited here Agent assistants: in person referral (point of contact)	In person recruitment, recruitment at food bank, scale, pedometer and 20$ financial incentive	X	X			X	Area	Low-income, primarily overweight / obese women	The eligibility checklist indicated that women met study criteria if they were eligible for SNAP, were aged 19–49 years, had a cell phone with text message capability, and had an active e-mail account. In addition, participants had to be at low risk for medical complications, as determined by PAR-Q.	N/A	Education, income	143	Education, n (%) High school 35 (32.0) 2Y/some college 41(37.6) ≥4 Y college 33 (30.4) Income, n (%) <$25,000/y 70 (64.0) $25,001 to $50,000/y 36 (33.0) ≥$50,001/y 3 (3.0)
18	Moll van Charante EPM	Prevention of dementia using mobile phone applications (PRODEMOS): a multinational, randomised, controlled effectiveness–implementation trial	2024	10.1016/ S2666-7568(24)00068-0	E-health application	Mobile application	Dementia	RCT	Described	UK and China (only UK population discussed)	Fifteen primary care practices chosen for their profile of the Index of Multiple Deprivation, representing less advantaged communities, led by the East of England regional Clinical Research Network.	No	N/A		Eligible patients were selected via the electronic health record. Potential participants were sent introductory letters via postal mail and were asked to contact the study team if they wished to take part. Potential participants were reminded after two weeks of the initial invitation via text message.	Healthcare	Primary care practices: access to general patients list, situated in a low SEP region (place), invitation letter (point of contact) , text message	Invitation letter, text message, location clinic	X	X				Area	Community dwelling adults aged 55–75 years with a low socioeconomic status	Low socioeconomic status in the UK was operationalised as living in a postal code area ranked as equal to or below the third decile of the index of multiple deprivation. Participants were eligible if they could make themselves sufficiently understandable in the national language (English in the UK, Mandarin in China), during the screening call (operationalised as being able to complete the screen…	Exclusion criteria were dementia, cognitive impairment (MMSE <24 for those with an International Standard Classification of Education [ISCED] level >1 or <21 for ISCED level ≤1), any condition expected to impede 18-month follow-up (eg, metastasised malignancy or severe psychiatric disease), smartphone illiteracy, present severe alcohol or illicit drug use, or severe visual impairment (appendix 2 …	Education, neighborhood	690	Educational level, n (%) Basic (ISCED 0-2) 78 (13·0) Middle (ISCED 3,4) 297 (49·5) High (ISCED 5+) 225 (37·5) Index of multiple deprivation (UK only) 0-20% 131 (21·8) 20-40% 204 (34·0) 40-60% 252 (42·0)
19	Baker DR	Proactively Connecting Residents in Underserved and Low Socioeconomic Status Communities with "Virtual Hospital" Telehealth Access in Response to the COVID-19 Pandemic	2021	10.1353/hpu.2021.0057	E-health application	Video communication	COVID19	Longitudinal	Evaluated	USA	This initiative took place in West Baltimore, an area of the city that faces significant adverse health outcomes. On the whole, Baltimore City’s health outcomes are the poorest among Maryland’s 24 counties. The communities served by this program fall into some of the most disadvantaged block groups of the Area Deprivation Index, which maps neighborhood- level socioeconomic status disadvantage bas…	No	N/A		Potential participants were selected based upon the severity of their COVID-19 Vulnerability Index. Patients were called to make an appointment with the mobile health unit. The mobile health unit would do a home-visit where participants could get tested for COVID-19 and receive videoconsultation with specialists.	Healthcare, citizens	Lifebridge health: virtual hospital van (facilitation, incentive, place), making appointments (point of contact) Residents: word-of-mouth (promotion)	Location mobile health van, phone call recruitment, word of mouth, healthcare delivered at home, free healthcare	X	X	X	X	X	Individual, area	Residents and medicaid-insured residents with a high risk of severe COVID complications from socially vulnerable areas	Residence of West Baltimore neighborhoods, individually targeted residents were medicaid insured high risk patients	N/A	Income, neigborhood	316	All participants lived in low socio-economic neighborhoods.	The program team faced difficulties reaching target individuals by phone as well as with appointment cancellations because many were fearful of potential COVID-19 transmission from allowing clinicians into their residences. After the pilot’s first four weeks in operation, awareness of the program soon spread through the community and prompted requests for visits. The program responded by shifting…
20	Miller HN	Recruitment of diverse community health center patients in a pragmatic weight gain prevention trial	2022	10.1017/ cts.2022.475	E-health application	Telehealth, wearable	Weight	Cross sectional study, secondary analysis RCT	Evaluated	USA	A network of 10 federally qualified community health centers in central North Carolina.	No	N/A		1. Health Center recruitment 1a. Health Center-Based Recruitment Provider referral: in-person referrals by PHS providers during outpatient medical appointment 1b. In-person staff recruitment: our research team deployed a bilingual (Spanish/English) research staff member to be stationed in the health center and receive provider or PHS staff referrals during appointments. 2. EHR-informed mail recru…	Healthcare, research	Health Center: In person referral physician / clinic staff (point of contact, place) Mail recruitment, signed by directors (promotion, point of contact)	Referral, e-mail recruitment, type clinic	X	X	X			Clinic	Adult (>21) patients enrolled at a FQHC	To be eligible for Balance, individuals had to be PHS patients, at least 21 years of age, and receiving care at one of the five participating PHS health centers. In addition, patients needed to attend an outpatient medical appointment within the previous 14 days prior to enrollment with a valid weight measured and documented within the PHS EHR. Weight had to be 380 pounds or less (due to the elec…	To maintain a pragmatic design, participants were only excluded for safety-related reasons or for the inability to collect follow-up data from the PHS EHR.	Education	848, health center recruitment: 478, mail recruitment: 208, combined recruitment: 162	Education level, n (%) Total: (n=848) Less than high school education 84 (9,9) High school graduate 151 (17,8) Some college/Vocational or trade school/Associate degree 159 (18,8) College graduate (4-year degree or beyond) 60 (7.1) Unknown 394 (46,5)	To maintain a pragmatic approach, our first recruitment method was provider referral. However, after a few months of in-person recruitment from providers, internal PHS reports indicated that only 10% of patients who had scheduled appointments and met main eligibility criteria for Balance were referred to the trial. Provider referral is a successful recruitment strategy; however, providers have pr…
21	Collombon E	Recruitment strategies for reaching adults aged 50 years and older with low socioeconomic status for participation in online physical activity interventions	2024	10.3389/fdgth.2024.1335713	E-health application	Web application, mobile application	Physical activity	Cross sectional study, secondary analysis RCT	Evaluated	Netherlands	Preselected areas in the Netherlands with a high prevalence of older low SEP citizens	Yes, scientific	The recruitment strategies were selected and considered appropriate and feasible based on previous eHealth studies conducted within our research group.	Prior research author, delivery, doi: 10.2196/jmir.2229, Coumans, J. M. J. (2022). MyLifestyleCoach: Development and evaluation of a web-based computer-tailored intervention for diet and physical activity guided by self-determination theory and motivational interviewing. [Doctoral Thesis, Open Universiteit]. Open Universiteit.	Three different recruitment strategies were deployed via (1) municipality, (2) gyms and (3) social media. Municipality: residents aged 50 years and older of three low SES neighbourhoods received a personal invitation letter by post on behalf of the municipality, a regional vitality organization and the university. Gyms: Gyms were invited to participate based on their location in a low SES region.…	Government, commercial, research	Municipality: send out signed invitation letters (promotion, point of contact, facilitation) Gyms in low SEP areas: promotion of app via social media or newsletter (promotion) Study staff: targeted online advertisement (promotion)	Invitation letter, e-mail recruitment via affiliated gyms, social media promotion via affiliated gyms’ outreach channels, targeted social media advertisements		X	X			Area	Low SEP people with and without a chronic disease, aged 50 years and older in Dutch low socioeconomic neighborhoods	A criterium for being classified into the (chronic) disease group was that participants were limited in being physically active as a result of their disease. Additional inclusion criteria applicable to the total sample were: (1) able to use a computer, laptop or tablet, (2) having an e-mail address, (3) having a smartphone, Eligibility to participate was assessed during the online registration pr…	Not previously participated in a study of the Active4Life project (11).	Education	407, recruitment: municipality: 281, gyms: 45, social media: 71, family and friends: 10	Educational level (n (%)) Low education 150 (36.9) Middle education 149 (36.6) High education 108 (26.5) Educational level per recruitment strategy Municipality (n=281) Low 128 (45.6) Middle 103 (36.7) High 50 (17.8) Gyms (n=45) Low 8 (17.8) Middle 15 (33.3) High 22 (48.9) Social media (n=71) Low 9 (12.7) Middle 29 (40.8) High 33 (46.5) Family + Friends (n=10) Low 5 (50.0) Middle 2 (20.0) High 3 …	Based on the results of this study, future eHealth-studies are recommended to recruit via personal invitation letters through a municipality in order to reach the low SES population. It remains unclear whether solely the sending of paper-based personal invitation letters, solely approaching the target population via a municipality or the combination of both was responsible for successfully reachi…
22	Nelson LA	Retaining diverse adults with diabetes in a long-term trial: Strategies, successes, and lessons learned	2021	10.1016/j.cct.2021.106388	E-health application	Telehealth	Diabetes	Longitudinal	Described	USA	Thirteen community health clinics located in and around Nashville, TN and 3 Vanderbilt primary care clinics. Community health clinics serve as safety net clinics and disproportionately serve Black/African Americans, Hispanics, and persons without health insurance	No	N/A		Eligible patients were selected via the electronic health record. Patients were sent introductory letters via postal mail and were followed-up for participation via phone call. Other recruitment methods included interest boxes and flyers in clinics, provider referral, and in-person recruitment in clinic waiting rooms and clinic-community events.	Healthcare, research	VanderBilt clinics: insight patients data for selection (place) All clinics: sending letters, referral by health providers, in-person recruitment (point of contact) promotion by flyers (promotion) Research assistance: phonecall (point of contact) providing education SMS (facilitation)	Invitation letters, referral, in-person recruitment during events and in waiting room, flyers, phone call recruitment, clinic type	X	X	X	X		Clinic, individual	Adults with type 2 diabetes who are public health insured or enrolled in safety net clinics	Eligible participants were adults (≥18 years old) with a T2D diagnosis and prescribed at least one daily diabetes medication	We excluded non-English speakers, patients whose most recent hemoglobin A1c (A1c) in the last 12 months was <6.8% (51 mmol/mol), patients who did not have a cell phone with texting capability, and those who could not receive, read, and respond to a text message after instruction from a trained RA.	Education, income	506	Socioeconomic status Education average, years: 14.1 ± 3.1 Annual household income n (%) < $10,000 92 (19.8) $10,000 – $34,999 189 (40.7) $35,000 – $54,999 68 (14.7) ≥ $55,000 115 (24.8) Health insuranced Uninsured 117 (23.3) Public only 126 (25.1) Private 259 (51.6) Homeless 58 (11.6)
23	Danila MI	Satisfaction with modes of telemedicine delivery during COVID-19: A randomized, single-blind, parallel group, noninferiority trial	2022	10.1016/j.amjms.2022.06.021	E-health application	Video communication	Access to care	RCT	Described	USA	At a large tertiary referral center in the South, a region which is home to many socioeconomically disadvantaged older individuals. The study was performed at the University of Alabama at Birmingham (UAB). Participants were enrolled from three clinical practices, including three physicians in rheumatology, five in cardiology, and three in family medicine.	No	N/A		Eligible patients were called two to three weeks prior to their routinely scheduled in-office visits and were invited to participate in videoconsults. Eligible participants had to successfully complete a test video call to be randomized.	Healthcare, research	Research team: Phone call recuitment (point of contact) Hospital: located in area where low SEP is prevalent	Phone call recruitment, location clinic	X	X				Area, individual	Older or public health insured patients	Participants were eligible if they: 1) were scheduled for a routine in-office follow-up visit; 2) were age 60 years or older or had public insurance (i.e., Medicare/Medicaid); and 3) had videoconferencing capability. Had at least one face-to-face visit with their physician in the past 12 months	We restricted our study population to individuals 60 years of age or older or those with public insurance because of perceived concerns about their comfort and facility in using videoconferencing technology in these socially vulnerable groups.	Education, income	269	Demographics from participants who completed the survey (n=200) Education n(%) Some college or more n=148 (74.0%) Employment status n(%) Unemployed n=156 (78.0%) Annual income, n (%) Low, < $29,999 35 (17.5%) Medium, $30,000-79,999 57 (28.5%) High, > $80,000 26 (13.0%) Prefer not to answer 82 (41%)
24	Bagner DM	Telehealth Treatment of Behavior Problems in Young Children With Developmental Delay A Randomized Clinical Trial	2023	10.1001/jamapediatrics.2022.5204	E-health application	Video communication	Children’s development	RCT	Described	USA	Three sites: 1) the University of Miami Early Steps office that serves north Miami-Dade County and draws a majority of referrals from high poverty urban neighborhoods, 2) the Nicklaus Children’s Hospital Early Steps office that serves south Miami-Dade County and Monroe county (including all of the Florida Keys—a geographically remote and underserved region in South Florida), and 3) the Wingate Oa…	No	N/A		Recruitment occurred during the child’s early intervention exit evaluation within 3 months of the child’s third birthday.	Healthcare, research	Clinics: located in low SEP region (place) Study staff: On exit-interview days, study staff will meet with families at these sites about their potential involvement in the study. (point of contact) Participant recruitment brochures (in English and Spanish) will be available at each recruitment site for participants to read a basic description of the study and conveniently obtain study contact inf…	Location clinic, clinic type, in person recruitment, brochures and website, facilitation of i-pad and in-ear Bluetooth device and support in setting up video meeting, max 100$ financial incentive	X	X	X	X	X	Clinic	Caregivers who have children with developmental delay	Inclusion criteria among these youth with DD were (1) Child Behavior Checklist (CBCL)33 externalizing problems T score greater than or equal to 60 and (2) the primary caregiver speaks English or Spanish.	Exclusion criteria were as follows: (1) child receiving psychiatric medication for behavior problems; (2) child/caregiver deafness or blindness; (3) severe child social communication deficits (ie, caregiver report on Social Responsiveness Scale, second edition,34 T score >75), although children with moderate social communication deficits (scores between 66-75), including those with autism spectru…	Education, income	150	Primary caregiver education (highest) n(%) Did not complete high school 14 (9.6) Graduated high school 60 (41.1) Graduated college 49 (33.6) Completed graduate degree 23 (15.4) Income-to-needs classification n(%) Extreme poverty/poor 42 (30.7) Low income 36 (26.3) Adequate income 32 (23.4) Affluent 27 (19.7)
25	Coker TR	Text2Breathe: Text-Message Intervention for Parent Communication and Pediatric Asthma	2022	10.1016/j.acap.2022.05.004	E-health application	Telehealth	Asthma	RCT	Described	USA	The emergency departments of 2 children’s hospitals in Seattle and Tacoma,WA	No	N/A		Potential eligible patients were selected from the electronic patient tracking board in the emergency department. Parents were approached in the emergency department to participate in the study. Parents were called if parents did not enroll in the text messaging program within three days after initial recruitment. Parents received 20$ for participation at baseline.	Healthcare, research	Clinical research associates: in person recruitment (point of contact) Study: financial incentive for participating in follow-up interviews (30 dollars), providing assistance with text program when participants text HELP (facilitation)	In person recruitment, support in e-health use, max 110$ financial incentive		X		X	X	Individual	Parents from Medicaid-insured children	Participating parents had to be the child’s primary asthma caregiver, speak English or Spanish, have unlimited texting, and could not be participating in another asthma-related study. Eligible children had an asthma or reactive airway disease diagnosis for ≥12 months.	Children were excluded if they were less likely to be receiving ongoing asthma care from their PCP (ie, seeing a pulmonary or allergy specialist more than once [ever]) or if they had significant medical comorbidities that required increased interaction with providers (ie, seeing any other medical subspecialist more than once in the last 12 months, being hospitalized [for any reason] more than onc…	Education, income	221	Parent education, n (%) Less than high school 32 (15) High school or General Educational Development 62 (28) Some college or technical/vocational training 79 (36) College or more 48 (22) Federal poverty level, n(%) <100% 110 (50) 100%−150% 45 (20) 150%−200% 37 (17) >200% 29 (13)
26	McEntee ML	The moderating impact of neighborhood walkability on mHealth interventions to increase moderate to vigorous physical activity for insufficiently active adults in a randomized trial	2023	10.1186/s12966-023-01494-2	E-health application	Telehealth, wearable	Physical activity	RCT	Described	USA	In Maricopa County, Arizona, GIS-measured walkability was calculated prior to the start of recruitment for all census block groups in the region, which were classified as either higher (7th -10th deciles) or lower (1st -4th deciles) walkability areas. Block groups were also classified according to median annual household income from the American Community Survey as either higher (7th-10th deciles…	Yes, scientific	Several theoretical approaches incorporate principles of positive reinforcement, which have been proposed as unifying tenets for preventive medicine. “Smaller, sooner incentives” for goal attainment (e.g., $1 per goal), are possible with mobile technologies and are hypothesized to result in greater PA than “larger, later incentives” (e.g., $100 at study end). Combining financial reinforcement wit…	Scientific publication: Behavior modification, Miltenberger, R. G. (1997). Behavior modification: Principles and procedures. Pacific Grove, CA:: Brooks/Cole Publishing Company. Theory: Behavioral choice theory, incentivization doi: 10.1016/S0749-3797(98)00083-X Scientific publications, incentivization, doi: 10.4324/9781410605061 Prior research author, incentivization, doi: 10.1371/journal.pone.00…	Particpants were recruited via targeted advertisements on Facebook. Advertisements were targeted on location (1 mile radius from the preselected neighborhood) and age (18-60 years of age). Participants were led to the study website to complete a prescreening survey. If eligible, participants were invited to an orientation office visit. Participants received 20$ at baseline, 40$ at end of the stud…	Research	Study: facebook ads in specific low and high SEP regions (promotion), facilitation of accelerometer at start study (facilitation), financial incentive at baseline and for reaching physical activity goals (incentive)	Targeted social media advertisement, facilitation accelerometer, max 415$ financial incentive			X	X	X	Area	Insufficiently active adults living in low and high socioeconomic neighborhoods	Participants were 512 healthy, insufficiently active adults aged 18–60 living in eligible neighborhoods, willing to wear a wrist-worn accelerometer and receive daily text messages as part of an mHealth intervention to increase MVPA.	Exclusion criteria included history of heart failure, type 2 diabetes, myocardial infarction, contraindications to exercise testing, currently or planning to become pregnant over the course of the study, and participation in other weight loss, diet, or PA programs. Those who planned to move or spend more than 30 days outside the area during the study were also excluded from participation.	Neighborhood	518	Total (N = 512) Community median household income Lower SES (1st–5th deciles) 240 (46.9) Higher SES (7th–10th deciles) 272 (53.2)
27	Horwitz MEM	The STAR-MAMA RCT: Bilingual Mobile Health Coaching for Postpartum Weight Loss	2023	10.1016/j.amepre.2023.03.021	E-health application	Telehealth	Diabetes	RCT	Described	USA	Four safety_x0002_net healthcare settings in San Francisco and Sonoma, CA: Zucker_x0002_berg San Francisco General Hospital; Santa Rosa Community Health Centers (Vista); and Women, Infants, and Children (WIC) offices in San Francisco and Sonoma	No	N/A		At Woman Infant and Child offices, staff contacted eligible individuals by phone to assess their willingness to participate in the study. At clinical sites, clinicians reviewed patient lists to identify eligible women, who were then contacted by on-site research assistants.	Healthcare	WIC - phone call recruitment (point of contact). Location where low SEP pregnant woman receive care (Place) Clinical sites - phone call recruitment (point of contact) Location where low SEP pregnant woman receive care (Place)	Phone call recruitment, location clinic, clinic type	X	X				Clinic	Pregnant women enrolled in a safety-net healthcare setting	Eligible women were aged 18−39 years, were at least 32 weeks pregnant, were with a recent GDM diagnosis or elevated BMI (>25 kg/m2 ), and had access to a landline or mobile phone to receive weekly health coaching calls.	N/A	Income	181	Control (n=91) Household income, n (%) <$20,000/year 55 (60.4) $20,000−30,000/year 20 (22.0) >$30,000/year 7 (7.7) Unknown/did not answer 9 (9.9) Insurance, n (%) MediCal or paid by MediCal 82 (90.1) Private 2 (2.2) Other 7 (7.7) Intervention (n=89) Household income, n (%) <$20,000/year 46 (51.7) $20,000−30,000/year 22 (24.7) >$30,000/year 10 (11.2) Unknown/did not answer 11 (12.4) Insurance, n (…
28	Baggett KM	Understanding the Steps Toward Mobile Early Intervention for Mothers and Their Infants Exiting the Neonatal Intensive Care Unit: Descriptive Examination	2020	10.2196/18519	E-health application	Web application, video communication	Children’s development	Cross sectional study	Evaluated	USA	Three Level 3 NICUs serving the urban poor in a Midwestern city. These NICUs were selected because they were part of a medical conglomerate with similar characteristics that included a centralized geographic location in the urban core within 2 square miles of one another, similar annual admission rates, and a racially and ethnically diverse patient population, including those who lack insurance a…	Yes, experiential and scientific	Experiential: through an iterative process, the research team conducted a series of meetings with each NICU team to generate a referral accountability plan, which was documented by the research team and provided to the NICU team for review and revision until the NICU team confirmed that their plan was complete and accurate. Each NICU-generated plan specified the NICU personnel who would share ref…	Scientific publication: delivery, doi 10.1177/0271121416678664	Two delivery strategies were compared in recruitment of low SEP mothers for digital health intervention. Sites 1 and 2 established a single gatekeeper as a point of referral from the NICU to the intervention. Site 3 established an open, shared referral approach in which the NICU psychologist shared referral materials with all nursing and social work staff and encouraged conversations between staf…	Healthcare, research	Clinic staff: referral (point of contact), located in low SEP region (place) Study staff: provide all mothers an iPhone with unlimited data, text, and call plan (incentive, facilitation), provide referral materials: service provider posters with mother and infant eligibility criteria, a mobile intervention study letter, a mother interest card for mothers to grant permission for study team follow-…	Location clinic, clinic type posters, interest cards, invitation letters, referral, borrowed i-phone, unlimited data, text and call plan, at home assistance at set up of application	X	X	X	X		Area	Mothers / adopters of babies living in a poor metropolitan area attending an NICUi serving the urban poor	Referral criteria included biological or adoptive mothers, living in the metropolitan area of the NICU, who spoke English and whose infants at birth weighed <2500 g, were at least 24 weeks’ gestational age, were no more than 5 months corrected gestational age at NICU exit, and who were not diagnosed with hydrocephalus, bronchopulmonary dysplasia, or beyond a grade 3 intraventricular hemorrhage.	N/A	Income, education	33	Income, % ≤100% federal poverty level 50% 101%-300% federal poverty level 31% >300% federal poverty level 19% Education % Maternal education (<college degree) 88%	The 3 referring Level 3 NICUs of similar annual census size and located within 2 square miles of one another demonstrated different levels of referral efficiency. In contrast to the closed, single gatekeeper referral approach of 2 NICUs, the shared, open referral approach of the third NICU resulted in higher referral efficiency. In addition, the shared, open NICU referral approach was associated …
29	Alcaraz KI	Use of Telephone and Digital Channels to Engage Socioeconomically Disadvantaged Adults in Health Disparities Research Within a Social Service Setting: Cross-Sectional Study	2020	10.2196/16680	E-health support service	eHealth enabling service	Access to care	Cross sectional study	Evaluated	USA	This study was conducted in partnership with 2-1-1, a nationally designated, locally administered information and referral system that connects individuals with resources to meet their basic human and social needs (eg, food, safety). Data indicate callers to 2-1-1 are disproportionately low income, uninsured, and unemployed and have high health needs such as for smoking cessation or cancer screen…	No	N/A		Seventeen members of the 2-1-1 staff were trained to recruit participants. Potential participants were recruited after they received the standard services from 2-1-1. All individuals searching for referrals on the 2-1-1 website were screened for eligibility; for the other four channels (telephone, text-message, live-chat and e-mail), only those individuals interacting with designated 2-1-1 staff …	Social services, research	2-1-1 connect centre - infrastructure for recruitment that is known among low SEP populations, phone and online recruitment (point of contact), Study - financial incentive and online local resource guide (incentive)	Infrastructure for recruitment that is known among low SEP populations, phone and online recruitment, 15$ financial incentive and online local resource guide		X			X	Clinic	Adults who use a support service for access to care and social support	Individuals were eligible for the 4C Study if they were accessing 2-1-1 for referral assistance via 1 of the 5 channels of interest (ie, telephone, website, text message, web-based live chat, email); accessing 2-1-1 from within United Way 2-1-1 of Greater Atlanta’s 13-county primary service area; aged ≥21 years; and able to speak or read English.	Exclusion criteria were the following: experiencing an acute crisis (eg, imminent eviction, natural disaster); accessing 2-1-1 on behalf of another person; accessing 2-1-1 in error; or performing a non-English search on the 2-1-1 website.	Education, income	3293, recruitment: telephone: 1907, e-mail: 28, web-based chat: 371, text message: 494, website: 493	Total n=3293 Educational attainment , n (%) Less than high school 430 (13.06) High school graduate or equivalent 991 (30.09) More than high school 1859 (56.45) Annual household i ncome (US $), n (%) Less than 5000 1222 (37.11) 5000 to 14,999 874 (26.54) 15,000 to 24,999 546 (16.58) 25,000 or more 500 (15.18) Health insurance type, n (%) Uninsured 993 (30.15) Public 1466 (44.52) Private 710 (21.56…	Channel type is just one possible strategy to consider for targeted recruitment planning. Other data, such as an individual’s social service needs [49] can be used to profile prospective participant subgroups. Additional research is needed within socioeconomically disadvantaged populations and across diverse recruitment venues, such as social service settings, to optimize recruitment outcomes for…
30	Obeid R	Using Telehealth to address disparities in cognitive, language, and emotion regulation problems in young children: A case illustration using the INvesT model	2019	10.1002/bdr2.1537	E-health application	Mobile application	Childrens' development	Cross sectional study, secondary analysis RCT	Described	USA	An urban community clinic that provides primary care services for low-income, urban, minority families. The clinic is located in the inner city in Cleveland, Ohio and is part of the Northeast Ohio Neighborhood Health Services, Inc. (NEON). The clinic provides primary healthcare services for patients regardless of their insurance status. The neighborhood area where the clinic is located has a medi…	Yes, scientific	By providing screening services during an already scheduled medical appointment, researchers are limiting the demand on the family to balance potentially inflexible work schedules and other family commitments. Using telehealth during an already scheduled appointed with a trusted primary care physician played an active role in ensuring that the child and family were directed connected to early int…	Scientific publication, delivery, doi: 10.1258/jtt.2011.100810	Staff nurses at the clinic offered each family the opportunity to participate in the study. Trained research assistants were available on site to explain the study's purpose and to help caregivers in case any questions arose. Ipad that was required for the intervention use was directly provided at the clinic.	Healthcare, research	Community clinic - location of clinic (place) Community clinic staff - in person recruitment (point of contact) Study: providance ipad (facilitation)	In person recruitment, location clinic, type clinic, facilitation i-pad	X	X		X		Clinic	High risk, urban children and their caregivers attending an urban community clinic	For caregivers to be included in this study, American English, or any related dialect, must have been the caregiver's and child's primary language. Caregivers of children who have not been diagnosed with a developmental disability and whose child/children were between the ages of 12 months to 7 years were eligible to participate.	N/A	Education, income	97	High school degree or less 60 (62) Having at least some college credit or a college degree 32 (33) Missing 5( 5) Employment Stay at home parents or unemployed 29 (30) Employed 58 (60) Missing 10 (10)
31	Wang C	Utility of a virtual counselor (VICKY) to collect family health histories among vulnerable patient populations: A randomized controlled trial	2021	10.1016/j.pec.2021.02.034	E-health application	Mobile application	Family health history	RCT	Described	USA	Boston Medical Center (BMC), the largest safetynet hospital in New England, where over 70% of the patient population are racial/ethnic minorities.	No	N/A		Patients with upcoming appointments were mailed a study invitation letter with the option to return an opt-out card if they were not interested. Those who did not op-out were contacted via telephone to determine if they were eligible for the study and invited for a baseline appointment.	Healthcare, research	Study - recruitment letter (point of contact) Clinic - safety net clinic, location low SEP (place)	Invitation letter, clinic type	X	X				Clinic	Adult patients enrolled in a safety net hospital	Those who were over the age of 21, able to speak English and/or Spanish, and a current BMC patient with an upcoming scheduled appointment within 3 months were deemed eligible to participate and scheduled for a baseline visit	N/A	Education, income	273	Education Less than 9ᵗʰ grade 16 (5.9%) HS, no diploma 34 (12.5%) HS graduate/GED 79 (28.9 %) Some college 62 (22.7%) College degree 54 (19.8%) Graduate or doctoral degree 28 (10.3%) Household income $25,000 141 (52.8%) $25,001-35,000 24 (9.0%) $35,001-50,000 34 (12.7%) $50,001-75,000 16 (6.0%) >$75,000 5 (1.9%) Prefer not to answer 47 (17.6%)
32	Wayne N	Health Coaching Reduces HbA1c in Type 2 Diabetic Patients From a Lower-Socioeconomic Status Community:A Randomized Controlled Trial	2015	10.2196/jmir.4871	E-health application	Mobile application	Diabetes	RCT	Described	USA	Two primary health clinics in Toronto, Canada. The populations served were from a lower-income neighborhood (90% of participants) and a midlevel-SES community (10% of participants).	No	N/A		Eligible patients were selected via the electronic health record. Additional recruitment assistance was obtained from associated diabetes education programs, primary care physicians, and locally practicing endocrinologists. Intervention group was provided with a smartphone and data plan for the duration of the study. Community health centre offered an exercise and education program for all partic…	Healthcare, research	Study - provide phone and data plan (facilitation), phone / mail recruitment (point of contact) Clinics - located in low SEP (place) Black creek community health centre - sportsplan (incentive) Associated programmes and health care professionals - in-person recruitment (point of contact)	Phone call recruitment, e-mail recruitment, in person recruitment, free sports plan, access to borrowed phone and data plan, location clinic, type clinic	X	X		X	X	Clinic	Patients with diabetes enrolled in primary health clinic	Patients were eligible for participation if diagnosed with T2DM, if they had an HbA1c ≥ 7.3% (56.3 mmol/mol) measured within 1 month of consent, and if they were under 70 years of age.	N/A	Education, income	131	Total n=97 Highest education level achieved, n (%) Less than high school 22 (23) High school diploma 35 (36) College or vocational training 25 (26) University degree 12 (12) Not disclosed 3 (3) Employment, n (%) Unemployed 35 (36) Student 4 (4) Part time 6 (6) Full time 25 (26) Retired 11 (11) Self-employed 9 (9) Work in home (eg, take care of children) 4 (4) Not disclosed 3 (3) Income in Can $, …
33	Smith JJ	Smart-Phone Obesity Prevention Trial for Adolescent Boys in Low-Income Communities: The ATLAS RCT	2014	10.1542/peds.2014-1012	E-health application	Mobile application web application, wearable	Weight	RCT	Described	Australia	State-funded coeducational secondary schools within low-income areas of New South Wales, Australia. The Socio- Economic Indexes For Areas (SEIFA) of relative socioeconomic disadvantage (scale: 1 = lowest to 10 = highest) was used to identify eligible schools. Public secondary schools located in the Newcastle, Hunter, and Central Coast regions of New South Wales with a SEIFA value of #5 (lowest 50…	No	N/A		All male students in their first year at the study schools completed a short screening questionnaire to assess their eligibility for inclusion. Students failing to meet international physical activity or screen-time guidelines were considered eligible and were invited to participate.	Research, education	Schools - place for recruitment low SEP students (place) Study - Invitation to trial (point of contact), facilitation pedometer	Location schools, facilitation pedometer, invitation letter	X	X		X		Area	Adolescent boys	Students failing to meet international physical activity or screen-time guidelines were considered eligible and were invited to participate	N /A	Neighborhood	361	Socioeconomic position SEIFA (Socio-Economic Indexes For Areas) of relative socioeconomic disadvantage based on residential postal code (1 = lowest, 10 = highest) 1–2 104 (29.0) 3–4 201 (56.0) 5–6 31 (8.6) 7–8 16 (4.5) 9–10 7 (1.9) Missing 2 (0.0)
