# Supplementary material for: A systematic literature review to identify delivery strategies of digital health for low SEP populations
Source: Research Square preprint supplement (doi:10.21203/rs.3.rs-8659891/v1), 2026-02-02
Supplement: Supplementary file 3 [file 417f58794bc6e7506dda9cb8.xlsx]

## Sheet: Table 3
Study ID	Statistical analysis methods	Aim evaluation	Number of participants (total, and if applicable intervention, control or before, after)	Outcome	Outcome significant (yes/no)
Point of contact
1. Staples et al. (42), 2022	Descriptives, chi-square, ANOVA	Difference in socioeconomic status of the patient population between physician-led referred patients and self-referred patients	Total: 9002 Physician-led referral): 4848	Physician-led referred patients were less likely to have a tertiary education and less likely to be employed. These patients were more likely to reside in urban regions, and in areas of higher socioeconomic disadvantage. Differences in education (X2 = 321.8, p < 0.001 ***), employment (X2 = 145.6, p < 0.001 ***) and IRSDa (X2 = 173.2, p < 0.001 ***).	Yes
			Self-referral: 4154
4. Garg et al. (47), 2023	Descriptives, generalized mixed-effects models	Difference in number of referrals to online social need resources between clinics that provide social needs screening and, e-health support and control clinics	Total: 878	Families at intervention clinics received significantly more referrals to online social need resources than families in control clinics (43.1% vs 1.9%; OR 4.6; 95% CI, 2.0–5.6).	Yes
			Intervention: 524
			Control: 354
7a. Ehmer et al. (51), 2021	Descriptives, Chi-square, t-test	Differences in patients’ insurance status between before and after the implementation of video consultations	Total: 1195	There were no statistically significant differences in the distribution of insurance status.	No
			Before: 397
			After: 798
11. Simione et al. (58), 2024 [(59)	Descriptives	Differences in number of referrals to an e-health weight management application after best practice alert between medical assistant initiated referral (Denver) and physician initiated referral (MHG and Prisma)	Total: 18.333	Medical assistant initiated referral (Denver Health) showed the most consistent follow-up from the intervention to e-health weight management application referral. After the intervention alert, for 5073/8480 (60%) of the patients action was taken, resulting in use of the tool kit by medical assistants for 4938/8480 (58%) of the patients and weight management application order for 4553/8480 (54%) …	N/A
			Denver: 8480 (46%)
			MGH: 6190 (34%)
			Prisma: 3663 (20%)
28. Baggett et al. (80), 2020	Descriptives	Difference in number of referrals between gatekeeper referral strategy (site 1 and 2) and shared referral strategy (site 3)	Total: 86	Gatekeeper referral strategies had a lower mean quarterly rate of 4.2 (Site 1) and 3.4 (Site 2) referrals per quarter compared to the shared referral strategy (site 3) which resulted into a quarterly rate of 13 referrals per quarter.	N/A
Promotion
10. Elam et al. (56), 2023 [(57)]	Descriptives, post-hoc Tukey-adjusted pairwise comparisons, Chi-square, Fisher exact tests, post-hoc Holm-adjusted pairwise comparisons	Differences in population’s insurance status between a free clinic and a federally qualified healthcare center (FQHC) and outreach strategies	Total: 647	Participants who had medical insurance compared to those who did not, a larger percentage reported hearing about the program from a friend (26.7% vs. 12.9%; Holm-adjusted P = 0.0074), a flyer outside the clinic (16.1% vs. 4.9%; Holm-adjusted P = 0.0050), the clinic website or social media (11.1% vs. 2.5%; Holm-adjusted P = 0.0092), or from a source reported as “Other” (13.3% vs. 5.5%; Holm-adjust…	Yes
			Free clinic: 356
			FQHC: 291
14. Oldham et al. (62), 2024 [(63, 64)]	Descriptives	Differences in reach of low SES participants between outreach strategies	Total: 5602	In total, 1451/5602 (25.9%) low SES participants were recruited. Recruitment via the National Health Service website (570/1961 (29.07%)), word of mouth (41/142 (28.87%)), and Google (50/159 (31.45%)) showed the highest percentage of low SES participant recruitment. However, both Google (159/5602, 2.84%) and word of mouth (142/5602, 2.53%) recruited a small proportion of participants in total. The…	N/A
20. Miller et al. (70), 2023	Descriptives, Chi-square, t-tests	Differences in reach between in-person recruitment, e-mail recruitment or a combined recruitment approach	Total: 848	People with some college education or a college degree were significant more likely to be recruited via e-mail recruitment compared to those with a high school education (38 and 35% vs. 14%, p < 0.0001).	Yes
			In-person: 478
			E-mail: 208 Combined: 162
21. Collombon et al. (71), 2024	Descriptives, Chi-square, ANOVA	Difference in reach of low socioeconomic participants between outreach strategies from municipalities, gyms, social media and word-of-mouth	Total: 407	In total, more low- (N = 150, 36.9%) and middle educated participants (N = 149, 36.6%) were reached than high-educated participants (N = 108, 26.5%). Significantly more low-educated participants were reached via the municipality (N = 128, 45.6%) than via gyms (N = 8, 17.8%) and social media (N = 9, 12.7%) (χ2= 50.429, P < .001).	Yes
			Municipality: 281
			Gyms: 45
			Social media: 71
			Family & friends: 10
29. Alcaraz, Vereen & Burnham (81), 2020	Descriptives, Chi-square, t-tests, multivariable binary logistic regression	Differences in education, income and public insurance status between patients recruited via phone-recruitment and digital recruitment.	Total: 3293	Respondents who were recruited via phone calls were more likely than respondents recruited by digital channels to have less educational attainment (310 (16.26%) VS 120 (8.66%), p<0.001), have less income (798 (41.85%) VS 424 (30.59%), p<0.001) and more likely to have public health insurance (947 (49.66%) VS 519 (37.45%), p<0.001). The odds of having a higher education (OR: 2.17, CI95 1.67-2.82), …	Yes
			Phone: 1907
			E-mail: 28
			Web-based chat: 371
			Text message: 494
			Website: 493
Place
10a. Elam et al. (56), 2023 [(57)]	Descriptives, post-hoc Tukey-adjusted pairwise comparisons, Chi-square, Fisher exact tests, post-hoc Holm-adjusted pairwise comparisons	Differences in reach between community- and clinic-based outreach strategies between a free clinic and a federally qualified healthcare center (FQHC)	Total: 647	Community-based recruitment was more effective in the free clinic compared to the FQHC, community-based recruitment counted for 72.6% of the recruited patients in the free clinic versus 31.6% of the recruited patients in the FQHC. Community outreach resulted in 265% additional recruitment in the free clinic and 46% additional recruitment in the FQHC. The free clinic recruited significantly more p…	Yes
			Free clinic: 356
			FQHC: 291
12. Levy et al. (60), 2021	Chi-square and the Cochrane Armitage test	Comparison in reach of citizens living in vulnerable communities between three consecutively executed COVID-19 testing interventions: drive through, a mobile van and a mobile van located based upon on data-driven location determination.	Total: 32.523	The permanent drive through (method A) testing site was least effective in recruiting people living in low socioeconomic neighborhoods (25% of the recruited population) followed by the use of the mobile COVID-19 health unit (method B) where location was determined via COVID-19 prevalence data only (27% of recruited population). The mobile COVID-19 health unit in combination with determination of …	Yes
19. Baker et al. (69), 2021	Descriptives	Differences in reach of identified Medicaid insured citizens with a high risk of COVID-19 morbidity between a COVID-19 mobile health van approach and a permanently located COVID-19 health facility	Total: 316	Participants in the pilot totaled 316 out of an initial contact list of 720 eligible high risk community residents. The mobile health van reached 156/720 (21.7%) of the high risk residents. By week five of this initiative, when screening shifted largely to a permanent COVID-19 facility. In the last two weeks of the intervention, the permanent location reached 160/720 (22.2%) of the high risk resi…	N/A
			Mobile health van: 156
			Permanent facility: 160
Facilitation
7. Ehmer et al. (51), 2021	Descriptives, Chi- square, t-tests	Before and after implementation of COVID-19 safe spaces and devices for video consultations	Total: 74	There were no significant differences in the insurance status of patients recruited before and after implementation of video consultations.	No
			Before: 33
			After: 41
