# Supplementary material for: A systematic literature review to identify delivery strategies of digital health for low SEP populations
Source: Research Square preprint supplement (doi:10.21203/rs.3.rs-8659891/v1), 2026-02-02
Supplement: Supplementary file 4 [file 6cd0c4bd814e64631ce2fc64.xlsx]

## Sheet: Table 2
Study ID	Stakeholders in delivery strategy execution	Delivery strategy activities	Type of incentive	Components delivery strategy (X)
				Place	Point of Contact	Promotion	Facilitation	Incentive
Five delivery strategy components
15. Castellon-Lopez et al. (65), 2024	Community, research	In-person recruitment, online promotion, support with online screening, flyers, information sessions, 40$ gift card	Financial	X	X	X	X	X
19. Baker et al. (69), 2021	Healthcare, citizens	Location mobile health van, phone call recruitment, word of mouth, healthcare delivered at home, free healthcare	Financial, temporal	X	X	X	X	X
24. Bagner et al. (74), 2023	Healthcare, research	Location clinic, clinic type, in person recruitment, brochures and website, facilitation of i-pad and in-ear Bluetooth device and support in setting up video meeting, max 100$ financial incentive	Financial	X	X	X	X	X
Four delivery strategy components
2. Steinberg et al (43), 2014 [(44)]	Healthcare, research	Invitation letters, brochures, location clinic, clinic type, 12-month gym membership	Service	X	X	X		X
4. Garg et al. (47), 2023	Healthcare	Referral, free support social needs, location clinic, type clinic	Service	X	X		X	X
5, 5.1. Vaughan et al. (48), 2021, Vaughan et al. (49), 2022	Healthcare, research	Referral, phone call recruitment, word of mouth, free food, free healthcare, clinic type	Service	X	X		X	X
9, 9.1. Bennett et al. (54), 2018, Foley et al. (55), 2016	Healthcare, research	Invitation letter, brochure, location clinic, type clinic, free scale	Device	X	X	X		X
12. Levy et al. (60), 2021	Healthcare, research, commercial, community	The van located where most vulnerable people live, promotion on the van, support with digital health use, free Wi-Fi	Service	X		X	X	X
14. Oldham et al. (62), 2024 [(63, 64)]	Healthcare, research, commercial government	Targeted and untargeted social media advertisements, advertisement through governmental and health organizations, radio, television, e-mail recruitment of users smoking cessation application, technical support, gift vouchers of up to £36	Financial		X	X	X	X
16. Thomas et al. (66), 2016	Community	In-person recruitment, promotion in church and health events, incentive via physical activity trackers, training in m-health use and technical support, recruitment and intervention in local church in low SEP area		X	X	X	X
22. Nelson et al. (72), 2021	Healthcare, research	Invitation letters, referral, in-person recruitment during events and in waiting room, flyers, phone call recruitment, clinic type		X	X	X	X
28. Baggett et al. (80), 2020	Healthcare, research	Location clinic, clinic type posters, interest cards, invitation letters, referral, borrowed i-phone, unlimited data, text and call plan, at home assistance at set up of application		X	X	X	X
32. Wayne et al. (84), 2015	Healthcare, research	Phone call recruitment, e-mail recruitment, in person recruitment, free sports plan, access to borrowed phone and data plan, location clinic, type clinic	Service	X	X		X	X
Three delivery strategy components
3. Kling et al. (45), 2020 [(46)]	Healthcare	In-person recruitment, phone call recruitment, clinic type, flyer, social media advertisement		X	X	X
6. Heisler et al. (50), 2014	Healthcare, research	Invitation letters, phone call recruitment, 20$ stipend after each assessment, location clinic, clinic type	Financial	X	X			X
7. Ehmer et al. (51), 2021	Healthcare	Phone call recruitment, referral, facilitation of space and devices for e-health use, location clinic, clinic type		X	X		X
10. Elam et al. (56), 2023 [(57)]	Healthcare, social services, community, citizens	Referral, in person recruitment, phone call recruitment, social media, offline advertisement, word of mouth, location clinic, clinic type		X	X	X
17. Griffin et al. (67), 2018	Community, government	In person recruitment, recruitment at food bank, scale, pedometer and 20$ financial incentive	Device, financial	X	X			X
20. Miller et al. (70), 2023	Healthcare, research	Referral, e-mail recruitment, type clinic		X	X	X
25. Coker et al. (75), 2022	Healthcare, research	In person recruitment, support in e-health use, max 110$ financial incentive	Financial		X		X	X
26. McEntee et al. (76), 2023 [(77, 78)]	Research	Targeted social media advertisement, facilitation accelerometer, max 415$ financial incentive	Financial			X	X	X
30. Obeid et al. (82), 2019	Healthcare, research	In person recruitment, location clinic, type clinic, facilitation i-pad		X	X		X
31. Smith et al. (85), 2014	Research, education	Location schools, facilitation pedometer, invitation letter		X	X		X
Two delivery strategy components
8. Pyne et al. (52), 2015 [(53)]	Healthcare, research	Referral, location clinic, clinic type		X	X
11. Simione et al. (58), 2024 [(59)]	Healthcare	Referral, location clinic, clinic type		X	X
13. Smithers et al. (61), 2024	Healthcare	Location clinic, in person recruitment		X	X
18. Moll van Charante et al. (68), 2024	Healthcare	Invitation letter, text message recruitment, location clinic		X	X
21. Collombon et al. (71), 2024	Government, commercial, research	Invitation letter, e-mail recruitment via affiliated gyms, social media promotion via affiliated gyms’ outreach channels, targeted social media advertisements			X	X
23. Danila et al. (73), 2022	Healthcare, research	Phone call recruitment, location clinic		X	X
27. Horwitz et al. (79), 2023	Healthcare	Phone call recruitment, location clinic, clinic type		X	X
29. Alcaraz, Vereen & Burnham (81), 2020	Research, social services	Infrastructure for recruitment that is known among low SEP populations, phone and online recruitment, 15$ financial incentive and online local resource guide	Financial, service		X			X
31. Wang et al. (83), 2021	Healthcare, research	Invitation letter, clinic type		X	X
One delivery strategy components
1. Staples et al. (42), 2022	Healthcare, citizens	Referral, self-referral			X
