# Supplementary material for: A systematic literature review to identify delivery strategies of digital health for low SEP populations
Source: Research Square preprint supplement (doi:10.21203/rs.3.rs-8659891/v1), 2026-02-02
Supplement: Supplementary file 5 [file a12f9b034b1a13e45d4402fe.xlsx]

## Sheet: Table 1
Study ID	Type of study	E-health type	Primary health outcome	Description target population	SEPh selection criteria
1. Staples et al. (42), 2022	Cohort	Web applications	Mental health	Adults living in Western Australia suffering from depression	Individual
2. Steinberg et al (43), 2014 [(44)]	RCTb	Telehealth	Weight	FQHCf enrolled overweight black female patients	Clinic
3. Kling et al. (45), 2020 [(46)]	RCT	EHRe	Weight	Mothers who are eligible to receive publicly funded childcare	Clinic
4. Garg et al. (47), 2023	RCT	EHR	Social needs	Medicaid-insured healthy low-income children	Clinic, individual
5. Vaughan et al. (48), 2021	RCT	Mobile application	Diabetes	Non-profit clinic enrolled Latino adults with type 2 diabetes	Clinic
5.1. Vaughan et al. (49), 2022	Longitudinal	Mobile application	Diabetes	Non-profit clinic enrolled Latino adults with type 2 diabetes	Clinic
6. Heisler et al. (50), 2014	RCT	Mobile application	Diabetes	FQHC enrolled patients with type 2 diabetes	Clinic
7. Ehmer et al. (51), 2021	Quasi-experimental	EHR, video communication	Mental health	Postpartum women and their children	Clinic
8. Pyne et al. (52), 2015 [(53)]	RCT	Web application, video communication	Mental health	FQHC enrolled patients suffering from depression	Clinic
9. Bennett et al. (54), 2018	RCT	Telehealth, wearable	Weight	Patients enrolled in a private non-profit healthcare facility with obesity and elevated risk of diabetes and cardiovascular disease	Clinic
9.1. Foley et al. (55), 2016	RCT	Telehealth, wearable	Weight	Patients enrolled in a private non-profit healthcare facility with obesity and elevated risk of diabetes and cardiovascular disease	Clinic
10. Elam et al. (56), 2023 [(57)]	Cohort	EHR, web application	Glaucoma	Adults enrolled in a free clinic or FQHC	Clinic
11. Simione et al. (58), 2024 [(59)]	Cross sectional	Telehealth, web application	Weight	Parents of children ages 2-12 years with elevated BMIg , enrolled in a FQHC, community health center or family medicine practice	Clinic
12. Levy et al. (60), 2021	Cross sectional	Telehealth	COVID19	People living in areas with increased social vulnerability	Area
13. Smithers et al. (61), 2024	RCT	Mobile application	Social needs	Parents at the children’s ward	Clinic
14. Oldham et al. (62), 2024 [(63, 64)]	Longitudinal	Mobile application	Alcohol consumption	Adults in the UK who want to drink less	N/A
15. Castellon-Lopez et al. (65), 2024	RCT	Web application	COVID19	Latino parents and caretakers of minors living in areas with low vaccine uptake	Area
16. Thomas et al. (66), 2016	Cross sectional	Wearable	Physical activity	Church attending adult African-American women living in areas with high poverty	Area
17. Griffin et al. (67), 2018	Quasi-experimental	Telehealth	Weight	Low-income, primarily overweight / obese women	Area
18. Moll van Charante et al. (68), 2024 a	RCT	Mobile application	Dementia	Community dwelling adults aged 55–75 years with a low socioeconomic status	Area
19. Baker et al. (69), 2021	Longitudinal	Video communication	COVID19	Residents and medicaid-insured residents with a high risk of severe COVID complications from socially vulnerable areas	Individual, area
20. Miller et al. (70), 2023	Cross sectional	Telehealth, wearable	Weight	Adult (>21) patients enrolled at a FQHC	Clinic
21. Collombon et al. (71), 2024	Cross-sectional	Web application, mobile application	Physical activity	Low SEP people with and without a chronic disease, aged 50 years and older in Dutch low socioeconomic neighborhoods	Area
22. Nelson et al. (72), 2021	Longitudinal	Telehealth	Diabetes	Adults with type 2 diabetes who are public health insured or enrolled in safety net clinics	Clinic, individual
23. Danila et al. (73), 2022	RCT	Video communication	Access to care	Older or public health insured patients	Area, individual
24. Bagner et al. (74), 2023	RCT	Video communication	Children’s development	Caregivers who have children with developmental delay	Clinic
25. Coker et al. (75), 2022	RCT	Telehealth	Asthma	Parents from Medicaid-insured children	Individual
26. McEntee et al. (76), 2023 [(77, 78)]	RCT	Telehealth, wearable	Physical activity	Insufficiently active adults living in low and high socioeconomic neighborhoods	Area
27. Horwitz et al. (79), 2023	RCT	Telehealth	Diabetes	Pregnant women enrolled in a safety-net healthcare setting	Clinic
28. Baggett et al. (80), 2020	Cross- sectional	Web application, video communication	Children’s development	Mothers / adopters of babies living in a poor metropolitan area attending an NICUi serving the urban poor	Area
29. Alcaraz, Vereen & Burnham (81), 2020	Cross-sectional	E-health enabling service	Access to care	Adults who use a support service for access to care and social support	Clinic
30. Obeid et al. (82), 2019	Cross-sectional	Mobile application	Childrens' development	High risk, urban children and their caregivers attending an urban community clinic	Clinic
31. Wang et al. (83), 2021	RCT	Mobile application	Family health history	Adult patients enrolled in a safety net hospital	Clinic
32. Wayne et al. (84), 2015	RCT	Mobile application	Diabetes	Patients with diabetes enrolled in primary health clinic	Clinic
33. Smith et al. (85), 2014	RCT	Mobile application web application, wearable	Weight	Adolescent boys	Area
