# Supplementary material for: A systematic literature review to identify delivery strategies of digital health for low SEP populations
Source: Research Square preprint supplement (doi:10.21203/rs.3.rs-8659891/v1), 2026-02-02
Supplement: Supplementary file 6 [file a20746d254fb46272b1e80c3.xlsx]

## Sheet: Articles screened for full text
No.	Full-text articles included for screening after title and abstract screening
1	Abughosh, S. M., Wang, X., Serna, O., Henges, C., Masilamani, S., Essien, E. J., . . . Fleming, M. (2016). A Pharmacist Telephone Intervention to Identify Adherence Barriers and Improve Adherence Among Nonadherent Patients with Comorbid Hypertension and Diabetes in a Medicare Advantage Plan. J Manag Care Spec Pharm, 22(1), 63-73. doi:10.18553/jmcp.2016.22.1.63
2	Agachi, E., Bijmolt, T. H. A., Mierau, J. O., & van Ittersum, K. (2022). Adoption of the Website and Mobile App of a Preventive Health Program Across Neighborhoods With Different Socioeconomic Conditions in the Netherlands: Longitudinal Study. JMIR Hum Factors, 9(1), e32112. doi:10.2196/32112
3	Akintoye, S., Ogoh, G., Krokida, Z., Nnadi, J., & Eke, D. (2021). Understanding the perceptions of UK COVID-19 contact tracing app in the BAME community in Leicester. Journal of Information Communication & Ethics in Society, 19(4), 521-536. doi:10.1108/Jices-06-2021-0071
4	Alarcon Belmonte, I., Sanchez Collado, R., Yuguero, O., Acezat Oliva, J., Martinez-Millana, A., & Saperas Perez, C. (2024). [Digital literacy as a key element in the digital transformation of health organizations]. Atencion Primaria, 56(6), 102880. doi:10.1016/j.aprim.2024.102880
5	Al-Aswad, L. A., Elgin, C. Y., Patel, V., Popplewell, D., Gopal, K., Gong, D., . . . Moazami, G. (2021). Real-Time Mobile Teleophthalmology for the Detection of Eye Disease in Minorities and Low Socioeconomics At-Risk Populations. Asia Pac J Ophthalmol (Phila), 10(5), 461-472. doi:10.1097/APO.0000000000000416
6	Alcaraz, K. I., Vereen, R. N., & Burnham, D. (2020). Use of Telephone and Digital Channels to Engage Socioeconomically Disadvantaged Adults in Health Disparities Research Within a Social Service Setting: Cross-Sectional Study. J Med Internet Res, 22(4), e16680. doi:10.2196/16680
7	Ansa, B. E., Alema-Mensah, E., Sheats, J. Q., Mubasher, M., & Akintobi, T. H. (2023). Colorectal Cancer Knowledge and Screening Change in African Americans: Implementation Phase Results of the EPICS Cluster RCT. AJPM focus, 2(4), 100121. doi:10.1016/j.focus.2023.100121
8	Antle, B. F., Owen, J. J., Eells, T. D., Wells, M. J., Harris, L. M., Cappiccie, A., . . . Wright, J. H. (2019). Dissemination of computer-assisted cognitive-behavior therapy for depression in primary care. Contemporary Clinical Trials, 78, 46-52. doi:10.1016/j.cct.2018.11.001
9	Apter, A. J., Bryant-Stephens, T., Morales, K. H., Wan, F., Hardy, S., Reed-Wells, S., . . . Localio, R. (2015). Using IT to improve access, communication, and asthma in African American and Hispanic/Latino Adults: Rationale, design, and methods of a randomized controlled trial. Contemporary Clinical Trials, 44, 119-128. doi:10.1016/j.cct.2015.08.001
10	Avegno, K. S., Roberson, K. B., Onsomu, E. O., Edwards, M. F., Dean, E. L., & Bertoni, A. G. (2023). Evaluating a Telephone and Home Blood Pressure Monitoring Intervention to Improve Blood Pressure Control and Self-Care Behaviors in Adults with Low-Socioeconomic Status. Int J Environ Res Public Health, 20(7). doi:10.3390/ijerph20075287
11	Avila-Garcia, P., Hernandez-Ramos, R., Nouri, S. S., Cemballi, A., Sarkar, U., Lyles, C. R., & Aguilera, A. (2019). Engaging users in the design of an mHealth, text message-based intervention to increase physical activity at a safety-net health care system. JAMIA Open, 2(4), 489-497. doi:10.1093/jamiaopen/ooz049
12	Baggett, K. M., Davis, B., Landry, S. H., Feil, E. G., Whaley, A., Schnitz, A., & Leve, C. (2020). Understanding the Steps Toward Mobile Early Intervention for Mothers and Their Infants Exiting the Neonatal Intensive Care Unit: Descriptive Examination. J Med Internet Res, 22(9), e18519. doi:10.2196/18519
13	Bagner, D. M., Berkovits, M. D., Coxe, S., Frech, N., Garcia, D., Golik, A., . . . Comer, J. S. (2023). Telehealth Treatment of Behavior Problems in Young Children With Developmental Delay: A Randomized Clinical Trial. JAMA Pediatr, 177(3), 231-239. doi:10.1001/jamapediatrics.2022.5204
14	Baker, D. R., Cadet, K., Mani, S., & Chatterjee, P. (2021). Proactively Connecting Residents in Underserved and Low Socioeconomic Status Communities with "Virtual Hospital" Telehealth Access in Response to the COVID-19 Pandemic. Journal of Health Care for the Poor and Underserved, 32(2 Suppl), 189-197. doi:10.1353/hpu.2021.0057
15	Barwise, A., Huschka, T., Woo, C., Egginton, J., Huang, L., Allen, J. S., . . . Allyse, M. (2023). Perceptions and Use of Telehealth Among Diverse Communities: Multisite Community-Engaged Mixed Methods Study. J Med Internet Res, 25, e44242. doi:10.2196/44242
16	Basu, S., Landon, B. E., Williams, J. W., Jr., Bitton, A., Song, Z., & Phillips, R. S. (2017). Behavioral Health Integration into Primary Care: a Microsimulation of Financial Implications for Practices. Journal of General Internal Medicine, 32(12), 1330-1341. doi:10.1007/s11606-017-4177-9
17	Baxter, S. N., Johnson, A. H., Brennan, J. C., Dolle, S. S., Turcotte, J. J., & King, P. J. (2023). The Efficacy of Telemedicine Versus In-Person Education for High-Risk Patients Undergoing Primary Total Joint Arthroplasty. Journal of Arthroplasty, 38(7), 1230-1237 e1231. doi:10.1016/j.arth.2023.01.015
18	Beattie, Z., Miller, L. M., Almirola, C., Au-Yeung, W. M., Bernard, H., Cosgrove, K. E., . . . Kaye, J. (2020). The Collaborative Aging Research Using Technology Initiative: An Open, Sharable, Technology-Agnostic Platform for the Research Community. Digit Biomark, 4(Suppl 1), 100-118. doi:10.1159/000512208
19	Bennett, G. G., Steinberg, D., Askew, S., Levine, E., Foley, P., Batch, B. C., . . . Miranda, H. (2018). Effectiveness of an App and Provider Counseling for Obesity Treatment in Primary Care. American Journal of Preventive Medicine, 55(6), 777-786. doi:10.1016/j.amepre.2018.07.005
20	Bhatti, S., Dahrouge, S., Muldoon, L., & Rayner, J. (2022). Using the quadruple aim to understand the impact of virtual delivery of care within Ontario community health centres: a qualitative study. BJGP Open, 6(4). doi:10.3399/BJGPO.2022.0031
21	Billimek, J., Guzman, H., & Angulo, M. A. (2015). Effectiveness and feasibility of a software tool to help patients communicate with doctors about problems they face with their medication regimen (EMPATHy): study protocol for a randomized controlled trial. Trials, 16(1), 145. doi:10.1186/s13063-015-0672-7
22	Bliss, J. W., Yau, A., Beideck, E., Novak, J. S. S., d'Andrea, F. B., Blobel, N. J., . . . Charney, P. (2022). A Medical Student-Run Telehealth Primary Care Clinic During the COVID-19 Pandemic: Maintaining Care for the Underserved. Journal of Primary Care & Community Health, 13, 21501319221114831. doi:10.1177/21501319221114831
23	Boland, V. C., Mattick, R. P., McRobbie, H., Siahpush, M., & Courtney, R. J. (2017). "I'm not strong enough; I'm not good enough. I can't do this, I'm failing"- A qualitative study of low-socioeconomic status smokers' experiences with accesssing cessation support and the role for alternative technology-based support. Int J Equity Health, 16(1), 196. doi:10.1186/s12939-017-0689-5
24	Boland, V. C., Mattick, R. P., Siahpush, M., Barker, D., Doran, C. M., Martire, K. A., . . . Courtney, R. J. (2019). Factors associated with Quitline and pharmacotherapy utilisation among low-socioeconomic status smokers. Addictive Behaviors, 89, 113-120. doi:10.1016/j.addbeh.2018.09.029
25	Bolen, S. D., Koroukian, S., Wright, J. T., Jr., Persaud, H., Einstadter, D., Fiegl, J., . . . Applegate, M. S. (2023). A Medicaid Statewide Hypertension Quality Improvement Project: Initial Results. Cureus, 15(3), e36132. doi:10.7759/cureus.36132
26	Bose, S., Dun, C., Zhang, G. Q., Walsh, C., Makary, M. A., & Hicks, C. W. (2022). Medicare Beneficiaries In Disadvantaged Neighborhoods Increased Telemedicine Use During The COVID-19 Pandemic. Health Aff (Millwood), 41(5), 635-642. doi:10.1377/hlthaff.2021.01706
27	Bradford, B. F., Cronin, R. S., Okesene-Gafa, K. A., Apaapa-Timu, T. H. S., Shashikumar, A., & Oyston, C. J. (2024). Diabetes in pregnancy: Women's views of care in a multi-ethnic, low socioeconomic population with midwifery continuity-of-care. Women Birth, 37(3), 101579. doi:10.1016/j.wombi.2024.01.005
28	Broom, M. A., Ladley, A. S., Rhyne, E. A., & Halloran, D. R. (2015). Feasibility and Perception of Using Text Messages as an Adjunct Therapy for Low-Income, Minority Mothers With Postpartum Depression. JMIR Ment Health, 2(1), e4. doi:10.2196/mental.4074
29	Brown, M., Ofili, E. O., Okirie, D., Pemu, P., Franklin, C., Suk, Y., . . . Dawes, D. (2019). Morehouse Choice Accountable Care Organization and Education System (MCACO-ES): Integrated Model Delivering Equitable Quality Care. Int J Environ Res Public Health, 16(17). doi:10.3390/ijerph16173084
30	Bruggeman, B. S., Walker, A. F., Peters, A. L., D'Avolio, L. W., & Haller, M. J. (2023). Blue Circle Health: A Novel Patient-Centered Model of Health Care Delivery for Low-Income Patients With Type 1 Diabetes. Journal of Diabetes Science and Technology, 17(4), 925-934. doi:10.1177/19322968221149008
31	Buss, V. H., Barr, M., Parker, S. M., Kabir, A., Lau, A. Y. S., Liaw, S. T., . . . Harris, M. F. (2024). Mobile App Intervention of a Randomized Controlled Trial for Patients With Obesity and Those Who Are Overweight in General Practice: User Engagement Analysis Quantitative Study. JMIR Mhealth Uhealth, 12, e45942. doi:10.2196/45942
32	Campos, C. L., Jones, D., Snively, B. M., Rocco, M., Pedley, C., Atwater, S., & Moore, J. B. (2021). Text Messaging and Home Blood Pressure Monitoring for Patients with Uncontrolled Hypertension: Proposal for a Feasibility Pilot Randomized Controlled Trial. JMIR Res Protoc, 10(5), e18984. doi:10.2196/18984
33	Castellon-Lopez, Y. M., Klomhaus, A. M., Garcia, C., Marquez, D., Avila, H., Gravette, H., . . . Blanco, L. (2024). MivacunaLA (MyshotLA): A Community-Partnered Mobile Phone Intervention to Improve COVID-19 Vaccination Behaviors among Low-Income, Spanish-Speaking, and Immigrant Latino Parents or Caregivers. Vaccines (Basel), 12(5). doi:10.3390/vaccines12050511
34	Chacko, A., Isham, A., Cleek, A. F., & McKay, M. M. (2016). Using mobile health technology to improve behavioral skill implementation through homework in evidence-based parenting intervention for disruptive behavior disorders in youth: study protocol for intervention development and evaluation. Pilot Feasibility Stud, 2, 57. doi:10.1186/s40814-016-0097-4
35	Chaudhry, B. M., Dasgupta, D., & Chawla, N. V. (2022). Successful Aging for Community-Dwelling Older Adults: An Experimental Study with a Tablet App. Int J Environ Res Public Health, 19(20). doi:10.3390/ijerph192013148
36	Chen, F., Su, W., Becker, S. H., Payne, M., Sweet, C. M. C., Peters, A. L., & Dall, T. M. (2016). Clinical and economic impact of a digital, remotely-delivered intensive behavioral counseling program on medicare beneficiariesat risk for diabetes and cardiovascular disease. PloS One, 11(10). doi:doi:10.1371/journal.pone.0163627 LK - https://rivm.on.worldcat.org/atoztitles/link?sid=EMBASE&sid=EMBAS…
37	Choi, N. G., Marti, C. N., Bruce, M. L., Hegel, M. T., Wilson, N. L., & Kunik, M. E. (2014). Six-month postintervention depression and disability outcomes of in-home telehealth problem-solving therapy for depressed, low-income homebound older adults. Depression and Anxiety, 31(8), 653-661. doi:10.1002/da.22242
38	Choy, M. A., O'Brien, K., Barnes, K., Sturgiss, E. A., Rieger, E., & Douglas, K. (2024). Evaluating the Digital Health Experience for Patients in Primary Care: Mixed Methods Study. J Med Internet Res, 26, e50410. doi:10.2196/50410
39	Christopoulos, K. A., Riley, E. D., Tulsky, J., Carrico, A. W., Moskowitz, J. T., Wilson, L., . . . Hilton, J. F. (2014). A text messaging intervention to improve retention in care and virologic suppression in a U.S. urban safety-net HIV clinic: study protocol for the Connect4Care (C4C) randomized controlled trial. BMC Infectious Diseases, 14(1), 718. doi:10.1186/s12879-014-0718-6
40	Ciccia, A. H., Roizen, N., Garvey, M., Bielefeld, R., & Short, E. J. (2015). Identification of neurodevelopmental disabilities in underserved children using telehealth (INvesT): Clinical trial study design. Contemporary Clinical Trials, 45(Pt B), 226-232. doi:10.1016/j.cct.2015.10.004
41	Clarke, P., Neffa-Creech, D., & Evans, S. H. (2022). Cooking app engages kids as well as moms: Inviting secondary users into health outreach. Health Educ. J., 81(1), 85-95. doi:doi:10.1177/00178969211049380 LK - https://rivm.on.worldcat.org/atoztitles/link?sid=EMBASE&sid=EMBASE&issn=17488176&id=doi:10.1177%2F00178969211049380&atitle=Cooking+app+engages+kids+as+well+as+moms%3A+Inviting+secondary+u…
42	Coker, T. R., Mitchell, S. J., Lowry, S. J., Klein, E. J., Stout, J. W., Brown, J. C., . . . Horn, I. B. (2023). Text2Breathe: Text-Message Intervention for Parent Communication and Pediatric Asthma. Academic Pediatrics, 23(1), 123-129. doi:10.1016/j.acap.2022.05.004
43	Collins, B. N., Lepore, S. J., Winickoff, J. P., Nair, U. S., Moughan, B., Bryant-Stephens, T., . . . Godfrey, M. (2018). An Office-Initiated Multilevel Intervention for Tobacco Smoke Exposure: A Randomized Trial. Pediatrics, 141(Suppl 1), S75-S86. doi:10.1542/peds.2017-1026K
44	Collombon, E., Bolman, C. A. W., de Bruijn, G. J., Peels, D. A., & Lechner, L. (2024). Recruitment strategies for reaching adults aged 50 years and older with low socioeconomic status for participation in online physical activity interventions. Front Digit Health, 6, 1335713. doi:10.3389/fdgth.2024.1335713
45	Cottrell-Daniels, C., Jones, D. M., Bell, S. A., Bandlamudi, M., & Spears, C. A. (2022). Mindfulness and Mobile Health for Quitting Smoking: A Qualitative Study Among Predominantly African American Adults with Low Socioeconomic Status. Am J Qual Res, 6(1), 19-41. doi:10.29333/ajqr/11427
46	Cruz, S., Lu, C., Ulloa, M., Redding, A., Hester, J., & Jacobs, M. (2024). Perceptions of Wearable Health Tools Post the COVID-19 Emergency in Low-Income Latin Communities: Qualitative Study. JMIR Mhealth Uhealth, 12, e50826. doi:10.2196/50826
47	Danila, M. I., Sun, D., Jackson, L. E., Cutter, G., Jackson, E. A., Ford, E. W., . . . Saag, K. G. (2022). Satisfaction with modes of telemedicine delivery during COVID-19: A randomized, single-blind, parallel group, noninferiority trial. American Journal of the Medical Sciences, 364(5), 538-546. doi:10.1016/j.amjms.2022.06.021
48	Davis, A. M., Befort, C. A., Lancaster, B. D., Tuck, C., Polivka, B. J., Carlson, J. A., . . . Murray, M. (2023). Rationale and design of integrating a parents first obesity intervention with a pediatric weight management intervention for rural families-Evaluating the ripple effect. Contemporary Clinical Trials, 128. doi:ARTN 107140
49	10.1016/j.cct.2023.107140
50	Denney-Wilson, E., Laws, R., Russell, C. G., Ong, K. L., Taki, S., Elliot, R., . . . K, J. C. (2015). Preventing obesity in infants: the Growing healthy feasibility trial protocol. BMJ Open, 5(11), e009258. doi:10.1136/bmjopen-2015-009258
51	Derksen, M. E., Jaspers, M. W., van Strijp, S., & Fransen, M. P. (2021). Mobile Health for Smoking Cessation Among Disadvantaged Young Women During and After Pregnancy: User-Centered Design and Usability Study. JMIR Form Res, 5(8), e24112. doi:10.2196/24112
52	Dodson, J. A., Schoenthaler, A., Fonceva, A., Gutierrez, Y., Shimbo, D., Banco, D., . . . Adhikari, S. (2022). Study design of BETTER-BP: Behavioral economics trial to enhance regulation of blood pressure. Int J Cardiol Cardiovasc Risk Prev, 15, 200156. doi:10.1016/j.ijcrp.2022.200156
53	Du, P., Yin, X., Kong, L., & Jung, J. (2021). A Telementoring Program and Hepatitis C Virus Care in Rural Patients. Telemed Rep, 2(1), 143-147. doi:10.1089/tmr.2021.0001
54	du Toit, M. N., van der Linde, J., & Swanepoel, W. (2021). mHealth developmental screening for preschool children in low-income communities. J Child Health Care, 25(4), 573-586. doi:10.1177/1367493520970012
55	Dutton, M. A., James, L., Langhorne, A., & Kelley, M. (2015). Coordinated public health initiatives to address violence against women and adolescents. J Womens Health (Larchmt), 24(1), 80-85. doi:10.1089/jwh.2014.4884
56	E, E., M, H., MP, H.-B., M, S., S, A., LE, B., . . . E, R. (2021). Prevention of dementia using mobile phone applications (PRODEMOS): protocol for an international randomised controlled trial (Vol. 11). England.
57	Efrat, M. W., Esparza, S., Mendelson, S. G., & Lane, C. J. (2015). The effect of lactation educators implementing a telephone-based intervention among low-income Hispanics: A randomised trial. Health Education Journal, 74(4), 424-441. doi:10.1177/0017896914542666
58	Eggink, E., Hafdi, M., Hoevenaar-Blom, M. P., Richard, E., Moll van Charante, E. P., & consortium, P. (2022). Attitudes and views on healthy lifestyle interventions for the prevention of dementia and cardiovascular disease among older people with low socioeconomic status: a qualitative study in the Netherlands. BMJ Open, 12(2), e055984. doi:10.1136/bmjopen-2021-055984
59	Ehmer, A. C., Scott, S. M., Smith, H., & Ashby, B. D. (2022). Connecting during COVID: The application of teleservices in two integrated perinatal settings. Infant Ment Health J, 43(1), 127-139. doi:10.1002/imhj.21958
60	Elam, A. R., Mobolaji, I., Flaharty, K., Niziol, L. M., Woodward, M. A., Zhang, J., . . . Newman-Casey, P. A. (2023). Engagement in the Michigan Screening and Intervention for Glaucoma and Eye Health through Telemedicine Program: Comparing the Effect of Clinic versus Community-Based Recruitment Strategies. Ophthalmol Glaucoma, 6(3), 266-276. doi:10.1016/j.ogla.2022.10.006
61	Espinoza, J., Chen, A., Orozco, J., Deavenport-Saman, A., & Yin, L. (2017). Effect of personal activity trackers on weight loss in families enrolled in a comprehensive behavioral family-lifestyle intervention program in the Federally Qualified Health Center setting: a randomized controlled trial. Contemp Clin Trials Commun, 7, 86-94. doi:10.1016/j.conctc.2017.06.004
62	Faber, J. S., Al-Dhahir, I., Reijnders, T., Chavannes, N. H., Evers, A. W. M., Kraal, J. J., . . . Visch, V. T. (2021). Attitudes Toward Health, Healthcare, and eHealth of People With a Low Socioeconomic Status: A Community-Based Participatory Approach. Front Digit Health, 3, 690182. doi:10.3389/fdgth.2021.690182
63	Fernandez, M. E., Schlechter, C. R., Del Fiol, G., Gibson, B., Kawamoto, K., Siaperas, T., . . . Wetter, D. W. (2020). QuitSMART Utah: an implementation study protocol for a cluster-randomized, multi-level Sequential Multiple Assignment Randomized Trial to increase Reach and Impact of tobacco cessation treatment in Community Health Centers. Implement Sci, 15(1), 9. doi:10.1186/s13012-020-0967-2
64	Foley, P., Steinberg, D., Levine, E., Askew, S., Batch, B. C., Puleo, E. M., . . . Bennett, G. G. (2016). Track: A randomized controlled trial of a digital health obesity treatment intervention for medically vulnerable primary care patients. Contemporary Clinical Trials, 48, 12-20. doi:10.1016/j.cct.2016.03.006
65	Fontil, V., McDermott, K., Tieu, L., Rios, C., Gibson, E., Sweet, C. C., . . . Lyles, C. R. (2016). Adaptation and Feasibility Study of a Digital Health Program to Prevent Diabetes among Low-Income Patients: Results from a Partnership between a Digital Health Company and an Academic Research Team. J Diabetes Res, 2016, 8472391. doi:10.1155/2016/8472391
66	Fortney, J. C., Heagerty, P. J., Bauer, A. M., Cerimele, J. M., Kaysen, D., Pfeiffer, P. N., . . . Unutzer, J. (2020). Study to promote innovation in rural integrated telepsychiatry (SPIRIT): Rationale and design of a randomized comparative effectiveness trial of managing complex psychiatric disorders in rural primary care clinics. Contemporary Clinical Trials, 90, 105873. doi:10.1016/j.cct.2019.…
67	Fowler-Davis, S., Young, R., Maden-Wilkinson, T., Hameed, W., Dracas, E., Hurrell, E., . . . Copeland, R. (2021). Assessing the Acceptability of a Co-Produced Long COVID Intervention in an Underserved Community in the UK. Int J Environ Res Public Health, 18(24). doi:10.3390/ijerph182413191
68	Fu, S. S., van Ryn, M., Nelson, D., Burgess, D. J., Thomas, J. L., Saul, J., . . . Joseph, A. M. (2016). Proactive tobacco treatment offering free nicotine replacement therapy and telephone counselling for socioeconomically disadvantaged smokers: a randomised clinical trial. Thorax, 71(5), 446-453. doi:10.1136/thoraxjnl-2015-207904
69	G, H., WE, Y., FA, M., & SS, M. (2020). Mobile health application platform 'Corrie' personalises and empowers the heart attack recovery patient experience in the hospital and at home for an underserved heart attack survivor (1757-790X (Electronic)). Retrieved from England: https://pubmed.ncbi.nlm.nih.gov/32071124/
70	Garg, A., Brochier, A., Tripodis, Y., Messmer, E., & Drainoni, M. L. (2023). A Social Care System Implemented in Pediatric Primary Care: A Cluster RCT. Pediatrics, 152(2). doi:10.1542/peds.2023-061513
71	Gillie, M., Ali, D., Vadlamuri, D., & Carstarphen, K. J. (2022). Telehealth Literacy as a Social Determinant of Health: A Novel Screening Tool to Support Vulnerable Patient Equity. J Alzheimers Dis Rep, 6(1), 67-72. doi:10.3233/ADR-210024
72	Godinho, M. A., Ashraf, M. M., Narasimhan, P., & Liaw, S. T. (2020). Community health alliances as social enterprises that digitally engage citizens and integrate services: A case study in Southwestern Sydney (protocol). Digit Health, 6, 2055207620930118. doi:10.1177/2055207620930118
73	Gonzalez, J. S., Hoogendoorn, C. J., Linnell, J., Fishman, S., Jonas, V., Pham-Singer, H., . . . Wu, W. Y. (2020). Design and methods of NYC care calls: An effectiveness trial of telephone-delivered type 2 diabetes self-management support. Contemporary Clinical Trials, 98, 106166. doi:10.1016/j.cct.2020.106166
74	Gordon, M., Henderson, R., Holmes, J. H., Wolters, M. K., Bennett, I. M., & Group, S. (2016). Participatory design of ehealth solutions for women from vulnerable populations with perinatal depression. Journal of the American Medical Informatics Association, 23(1), 105-109. doi:10.1093/jamia/ocv109
75	Griffin, J. B. (2023). Effectiveness of a text messaging program to promote weight loss and improve dietary behaviors in low-income women ages 19-49 years. (84). ProQuest Information & Learning, Retrieved from https://search.ebscohost.com/login.aspx?direct=true&db=psyh&AN=2023-55665-252&site=ehost-live (8)
76	Griffin, J. B., Struempler, B., Funderburk, K., Parmer, S. M., Tran, C., & Wadsworth, D. D. (2018). My Quest, an Intervention Using Text Messaging to Improve Dietary and Physical Activity Behaviors and Promote Weight Loss in Low-Income Women. Journal of Nutrition Education and Behavior, 50(1), 11-18 e11. doi:10.1016/j.jneb.2017.09.007
77	Guadamuz, J. S., McCormick, C. D., Choi, S., Urick, B., Alexander, G. C., & Qato, D. M. (2021). Telepharmacy and medication adherence in urban areas. Journal of the American Pharmacists Association, 61(2), e100-e113. doi:10.1016/j.japh.2020.10.017
78	Guterman, E. L., Kiekhofer, R. E., Wood, A. J., Allen, I. E., Kahn, J. G., Dulaney, S., . . . Possin, K. L. (2023). Care Ecosystem Collaborative Model and Health Care Costs in Medicare Beneficiaries With Dementia: A Secondary Analysis of a Randomized Clinical Trial. JAMA Intern Med, 183(11), 1222-1228. doi:10.1001/jamainternmed.2023.4764
79	Haas, J. S., Linder, J. A., Park, E. R., Gonzalez, I., Rigotti, N. A., Klinger, E. V., . . . Williams, D. R. (2015). Proactive tobacco cessation outreach to smokers of low socioeconomic status: a randomized clinical trial. JAMA Intern Med, 175(2), 218-226. doi:10.1001/jamainternmed.2014.6674
80	Hark, L. A., Adeghate, J., Katz, L. J., Ulas, M., Waisbourd, M., Maity, A., . . . Myers, J. S. (2020). Philadelphia Telemedicine Glaucoma Detection and Follow-Up Study: Cataract Classifications Following Eye Screening. Telemedicine Journal and e-Health, 26(8), 992-1000. doi:10.1089/tmj.2019.0170
81	Harte, R., Norton, L., Whitehouse, C., Lorincz, I., Jones, D., Gerald, N., . . . Kangovi, S. (2022). Design of a randomized controlled trial of digital health and community health worker support for diabetes management among low-income patients. Contemp Clin Trials Commun, 25, 100878. doi:10.1016/j.conctc.2021.100878
82	Heffner, J. L., Kelly, M. M., Reilly, E. D., Reece, S. G., Claudio, T., Serfozo, E., . . . Karekla, M. (2023). An Avatar-Led Web-Based and SMS Text Message Smoking Cessation Program for Socioeconomically Disadvantaged Veterans: Pilot Randomized Controlled Trial. JMIR Form Res, 7, e44503. doi:10.2196/44503
83	Heisler, M., Choi, H., Palmisano, G., Mase, R., Richardson, C., Fagerlin, A., . . . An, L. C. (2014). Comparison of community health worker-led diabetes medication decision-making support for low-income Latino and African American adults with diabetes using e-health tools versus print materials: a randomized, controlled trial. Annals of Internal Medicine, 161(10 Suppl), S13-22. doi:10.7326/M13-30…
84	Hernandez-Ramos, R., Aguilera, A., Garcia, F., Miramontes-Gomez, J., Pathak, L. E., Figueroa, C. A., & Lyles, C. R. (2021). Conducting Internet-Based Visits for Onboarding Populations With Limited Digital Literacy to an mHealth Intervention: Development of a Patient-Centered Approach. JMIR Form Res, 5(4), e25299. doi:10.2196/25299
85	Hoffman, L., Benedetto, E., Huang, H., Grossman, E., Kaluma, D., Mann, Z., & Torous, J. (2019). Augmenting Mental Health in Primary Care: A 1-Year Study of Deploying Smartphone Apps in a Multi-site Primary Care/Behavioral Health Integration Program. Front Psychiatry, 10, 94. doi:10.3389/fpsyt.2019.00094
86	Hooper, M. W., Miller, D. B., Saldivar, E., Mitchell, C., Johnson, L., Burns, M., & Huang, M. C. (2021). Randomized Controlled Trial Testing a Video-Text Tobacco Cessation Intervention Among Economically Disadvantaged African American Adults. Psychology of Addictive Behaviors, 35(7), 769-777. doi:10.1037/adb0000691
87	Horwitz, M. E. M., Edwards, C. V., Athavale, P., McCloskey, L., Cabral, H. J., Benjamin, E. J., & Handley, M. A. (2023). The STAR-MAMA RCT: Bilingual Mobile Health Coaching for Postpartum Weight Loss. American Journal of Preventive Medicine, 65(4), 596-607. doi:10.1016/j.amepre.2023.03.021
88	Husain, L., Finlay, T., Husain, A., Wherton, J., Hughes, G., & Greenhalgh, T. (2024). Developing user personas to capture intersecting dimensions of disadvantage in older patients who are marginalised: a qualitative study. British Journal of General Practice, 74(741), e250-e257. doi:10.3399/BJGP.2023.0412
89	Jelinek, M. V., Santamaria, J. D., Best, J. D., Thompson, D. R., Tonkin, A. M., & Vale, M. J. (2014). Reversing social disadvantage in secondary prevention of coronary heart disease. International Journal of Cardiology, 171(3), 346-350. doi:10.1016/j.ijcard.2013.12.022
90	JI, V., YT, S., MS, B., SK, S., DS, H., C, C.-D., . . . DJ, V. (2022). Comparison of an automated smartphone-based smoking cessation intervention versus standard quitline-delivered treatment among underserved smokers: protocol for a randomized controlled trial (Vol. 22). England.
91	JK, R., MW, R., S, F., JF, G., D, M., D, B., . . . EA, P. (2020). Adapting home telehealth group appointment model (CoYoT1 clinic) for a low SES, publicly insured, minority young adult population with type 1 diabetes (Vol. 88). United States.
92	JM, S., JD, M., FE, d. B., GJ, d. B., M, G., MC, H., . . . JWJ, B. (2020). Reducing cardiometabolic risk in adults with a low socioeconomic position: protocol of the Supreme Nudge parallel cluster-randomised controlled supermarket trial (Vol. 19). England.
93	Johnson-Griggs, M. A., Hicks, P. M., Lu, M. C., Sherman, E., Niziol, L. M., Elam, A. R., . . . Newman-Casey, P. A. (2024). Relationship between Unstable Housing, Food Insecurity, and Vision Status in the MI-SIGHT Community Eye Disease Screening Program. Ophthalmology, 131(2), 140-149. doi:10.1016/j.ophtha.2023.09.011
94	Jones, C., Gibbons, M., Magsamen-Conrad, K., Ulanday, K. T., Watterson, J., Oakley-Girvan, I., . . . Gokal, K. (2022). "Mother's Health and Well-Being Matters: Is a Mediated Social Cohesion Public Health Intervention Feasible?". American Journal of Health Promotion, 36(3), 410-420. doi:10.1177/08901171211055317
95	Karimi, N., Crawford, D., Opie, R., Maddison, R., O'Connell, S., Hamblin, P. S., . . . Ball, K. (2020). EatSmart, a Web-Based and Mobile Healthy Eating Intervention for Disadvantaged People With Type 2 Diabetes: Protocol for a Pilot Mixed Methods Intervention Study. JMIR Res Protoc, 9(11), e19488. doi:10.2196/19488
96	Karimi, N., Opie, R., Crawford, D., O'Connell, S., Hamblin, P. S., Steele, C., & Ball, K. (2023). Participants' and Health Care Providers' Insights Regarding a Web-Based and Mobile-Delivered Healthy Eating Program for Disadvantaged People With Type 2 Diabetes: Descriptive Qualitative Study. JMIR Form Res, 7, e37429. doi:10.2196/37429
97	Karssen, L. T., Larsen, J. K., Burk, W. J., Kremers, S. P. J., Hermans, R. C. J., Ruiter, E. L. M., . . . de Weerth, C. (2022). Process and effect evaluation of the app-based parenting program Samen Happie! on infant zBMI: A randomized controlled trial. Front Public Health, 10, 1012431. doi:10.3389/fpubh.2022.1012431
98	Karssen, L. T., Vink, J. M., de Weerth, C., Hermans, R. C. J., de Kort, C. P. M., Kremers, S. P., . . . Larsen, J. K. (2021). An App-Based Parenting Program to Promote Healthy Energy Balance-Related Parenting Practices to Prevent Childhood Obesity: Protocol Using the Intervention Mapping Framework. JMIR Form Res, 5(5), e24802. doi:10.2196/24802
99	Katzmarzyk, P. T., Martin, C. K., Newton, R. L., Jr., Apolzan, J. W., Arnold, C. L., Davis, T. C., . . . Springgate, B. (2018). Promoting Successful Weight Loss in Primary Care in Louisiana (PROPEL): Rationale, design and baseline characteristics. Contemporary Clinical Trials, 67, 1-10. doi:10.1016/j.cct.2018.02.002
100	Kendzor, D. E., Businelle, M. S., Vidrine, D. J., Frank-Pearce, S. G., Shih, Y. T., Dallery, J., . . . Ehlke, S. J. (2022). Mobile contingency management for smoking cessation among socioeconomically disadvantaged adults: Protocol for a randomized trial (Vol. 114). United States.
101	Kendzor, D. E., Businelle, M. S., Waring, J. J. C., Mathews, A. J., Geller, D. W., Barton, J. M., . . . Vidrine, D. J. (2020). Automated Mobile Delivery of Financial Incentives for Smoking Cessation Among Socioeconomically Disadvantaged Adults: Feasibility Study. JMIR Mhealth Uhealth, 8(4), e15960. doi:10.2196/15960
102	Killeen, O. J., Niziol, L. M., Elam, A. R., Bicket, A. K., John, D., Wood, S. D., . . . Newman-Casey, P. A. (2024). Visual Impairment from Uncorrected Refractive Error among Participants in a Novel Program to Improve Eye Care Access among Low-Income Adults in Michigan. Ophthalmology, 131(3), 349-359. doi:10.1016/j.ophtha.2023.09.025
103	Kim, R. G., Medina, S. P., Magee, C., & Khalili, M. (2022). Fatty Liver and the Coronavirus Disease 2019 Pandemic: Health Behaviors, Social Factors, and Telemedicine Satisfaction in Vulnerable Populations. Hepatol Commun, 6(5), 1045-1055. doi:10.1002/hep4.1873
104	Kling, S. M., Harris, H. A., Marini, M., Cook, A., Hess, L. B., Lutcher, S., . . . Bailey-Davis, L. (2020). Advanced Health Information Technologies to Engage Parents, Clinicians, and Community Nutritionists in Coordinating Responsive Parenting Care: Descriptive Case Series of the Women, Infants, and Children Enhancements to Early Healthy Lifestyles for Baby (WEE Baby) Care Randomized Controlled …
105	Kohli, M., Pasipanodya, E. C., Montoya, J. L., Marquine, M., Hoenigl, M., Serrano, V., . . . Moore, D. J. (2020). A Culturally Adapted SMS Text Messaging Intervention to Promote Antiretroviral Therapy Adherence Among African Americans: Protocol for a Single-Arm Trial. JMIR Res Protoc, 9(12), e21592. doi:10.2196/21592
106	Kuhlberg, H., Kujala, S., Horhammer, I., & Koskela, T. (2021). STAR Duodecim eHealth Tool to Recognize Chronic Disease Risk Factors and Change Unhealthy Lifestyle Choices Among the Long-Term Unemployed: Protocol for a Mixed Methods Validation Study. JMIR Res Protoc, 10(6), e27668. doi:10.2196/27668
107	Lazaridis, D., Partosh, D., Ricabal, L. C., & Sherbeny, F. (2024). Impact of a centralized population health pharmacy program on value-based Medicare patients. Journal of the American Pharmacists Association, 64(1), 146-153. doi:10.1016/j.japh.2023.09.008
108	Leath, B. A., Dunn, L. W., Alsobrook, A., & Darden, M. L. (2018). Enhancing Rural Population Health Care Access and Outcomes Through the Telehealth EcoSystem Model. Online J Public Health Inform, 10(2), e218. doi:10.5210/ojphi.v10i2.9311
109	Lee, E. W., McCloud, R. F., & Viswanath, K. (2022). Designing Effective eHealth Interventions for Underserved Groups: Five Lessons From a Decade of eHealth Intervention Design and Deployment. J Med Internet Res, 24(1), e25419. doi:10.2196/25419
110	Lemacks, J. L., Abbott, L. S., Navarro, C., McCoy, S., Greer, T., Aras, S., . . . Johnson, M. (2023). Passive recruitment reach of a lifestyle management program to address obesity in the deep south during the COVID-19 pandemic. AIMS public health, 10(1), 116-128. doi:10.3934/publichealth.2023010
111	Leon-Salas, A., Hunt, J. J., Richter, K. P., Nazir, N., Ellerbeck, E. F., & Shireman, T. I. (2017). Pharmaceutical assistance programs to support smoking cessation medication access. Journal of the American Pharmacists Association, 57(1), 67-71 e61. doi:10.1016/j.japh.2016.08.009
112	Levy, P., McGlynn, E., Hill, A. B., Zhang, L., Korzeniewski, S. J., Foster, B., . . . Shanley, C. J. (2021). From pandemic response to portable population health: A formative evaluation of the Detroit mobile health unit program. PloS One, 16(11), e0256908. doi:10.1371/journal.pone.0256908
113	Lewinski, A. A., Patel, U. D., Diamantidis, C. J., Oakes, M., Baloch, K., Crowley, M. J., . . . Bosworth, H. B. (2019). Addressing Diabetes and Poorly Controlled Hypertension: Pragmatic mHealth Self-Management Intervention. J Med Internet Res, 21(4), e12541. doi:10.2196/12541
114	Leziak, K., Birch, E., Jackson, J., Strohbach, A., Niznik, C., & Yee, L. M. (2021). Identifying Mobile Health Technology Experiences and Preferences of Low-Income Pregnant Women with Diabetes. Journal of Diabetes Science and Technology, 15(5), 1018-1026. doi:10.1177/1932296821993175
115	Lin, N. Y., Ramsey, R. R., Miller, J. L., McDowell, K. M., Zhang, N., Hommel, K., & Guilbert, T. W. (2020). Telehealth delivery of adherence and medication management system improves outcomes in inner-city children with asthma. Pediatric Pulmonology, 55(4), 858-865. doi:10.1002/ppul.24623
116	Love, S. M., Sanders, M. R., Turner, K. M., Maurange, M., Knott, T., Prinz, R., . . . Ainsworth, A. T. (2016). Social media and gamification: Engaging vulnerable parents in an online evidence-based parenting program. Child Abuse and Neglect, 53, 95-107. doi:10.1016/j.chiabu.2015.10.031
117	Mak, S. S.-L. (2019). Mobile health technology use in vulnerable populations. (80). ProQuest Information & Learning, Retrieved from https://search.ebscohost.com/login.aspx?direct=true&db=psyh&AN=2019-46356-109&site=ehost-live (11)
118	Mandelbaum, J., Myers, K. G., Brightharp, C. L., & Hicks, S. P. (2023). Assessment of Chronic Disease Management Strategies Among Health Care Practices in Medically Underserved South Carolina Counties. Health Education and Behavior, 50(3), 406-415. doi:10.1177/10901981211057538
119	Manios, Y., Androutsos, O., Lambrinou, C. P., Cardon, G., Lindstrom, J., Annemans, L., . . . Makrilakis, K. (2018). A school- and community-based intervention to promote healthy lifestyle and prevent type 2 diabetes in vulnerable families across Europe: design and implementation of the Feel4Diabetes-study. Public Health Nutrition, 21(17), 3281-3290. doi:10.1017/S1368980018002136
120	Massoudi, B. L., Marcial, L. H., Haque, S., Bailey, R., Chester, K., Cunningham, S., . . . Soper, P. (2014). Beacon communities' public health initiatives: a case study analysis. EGEMS (Wash DC), 2(3), 1093. doi:10.13063/2327-9214.1093
121	Matthews, E. B., Savoy, M., Paranjape, A., Washington, D., Hackney, T., Galis, D., & Zisman-Ilani, Y. (2022). Acceptability of Health Information Exchange and Patient Portal Use in Depression Care Among Underrepresented Patients. Journal of General Internal Medicine, 37(15), 3947-3955. doi:10.1007/s11606-022-07427-2
122	Mavandadi, S., Benson, A., DiFilippo, S., Streim, J. E., & Oslin, D. (2015). A Telephone-Based Program to Provide Symptom Monitoring Alone vs Symptom Monitoring Plus Care Management for Late-Life Depression and Anxiety: A Randomized Clinical Trial. JAMA Psychiatry, 72(12), 1211-1218. doi:10.1001/jamapsychiatry.2015.2157
123	Mavandadi, S., Wray, L. O., DiFilippo, S., Streim, J., & Oslin, D. (2017). Evaluation of a Telephone-Delivered, Community-Based Collaborative Care Management Program for Caregivers of Older Adults with Dementia. American Journal of Geriatric Psychiatry, 25(9), 1019-1028. doi:10.1016/j.jagp.2017.03.015
124	Mayberry, L. S., Berg, C. A., Harper, K. J., & Osborn, C. Y. (2016). The Design, Usability, and Feasibility of a Family-Focused Diabetes Self-Care Support mHealth Intervention for Diverse, Low-Income Adults with Type 2 Diabetes. J Diabetes Res, 2016, 7586385. doi:10.1155/2016/7586385
125	McConnell, M. A., Rokicki, S., Ayers, S., Allouch, F., Perreault, N., Gourevitch, R. A., . . . Baicker, K. (2023). Effect of an Intensive Nurse Home Visiting Program on Adverse Birth Outcomes in a Medicaid-Eligible Population: A Randomized Clinical Trial. Obstet. Gynecol. Surv., 78(1), 7-9. doi:doi:10.1097/OGX.0000000000001121 LK - https://rivm.on.worldcat.org/atoztitles/link?sid=EMBASE&sid=EMBAS…
126	McEntee, M. L., Hurley, J. C., Phillips, C. B., Hooker, S. P., Todd, M., Frank, L. D., & Adams, M. A. (2023). The moderating impact of neighborhood walkability on mHealth interventions to increase moderate to vigorous physical activity for insufficiently active adults in a randomized trial. The International Journal of Behavioral Nutrition and Physical Activity, 20(1), 97. doi:10.1186/s12966-023-…
127	Meijer, E., Korst, J. S., Oosting, K. G., Heemskerk, E., Hermsen, S., Willemsen, M. C., . . . Brown, J. (2021). "At least someone thinks I'm doing well": a real-world evaluation of the quit-smoking app StopCoach for lower socio-economic status smokers. Addiction Science & Clinical Practice, 16(1), 48. doi:10.1186/s13722-021-00255-5
128	Mhende, J., Bell, S. A., Cottrell-Daniels, C., Luong, J., Streiff, M., Dannenfelser, M., . . . Spears, C. A. (2021). Mobile Delivery of Mindfulness-Based Smoking Cessation Treatment Among Low-Income Adults During the COVID-19 Pandemic: Pilot Randomized Controlled Trial. JMIR Form Res, 5(7), e25926. doi:10.2196/25926
129	Michel, A., Minton, L., Sullivan, C., Fontenot, H., & Lee, M. J. (2023). Integrating Mobile and Portable Technologies With In-Person and Telehealth Care to Increase Perinatal Healthcare Equity for the Unstably Housed. Journal of Perinatal and Neonatal Nursing, 37(1), 27-35. doi:10.1097/JPN.0000000000000705
130	Miller, D. P., Jr., Weaver, K. E., Case, L. D., Babcock, D., Lawler, D., Denizard-Thompson, N., . . . Spangler, J. G. (2017). Usability of a Novel Mobile Health iPad App by Vulnerable Populations. JMIR Mhealth Uhealth, 5(4), e43. doi:10.2196/mhealth.7268
131	Miller, H. N., Berger, M. B., Askew, S., Kay, M. C., Chisholm, M., Sirdeshmukh, G., . . . Bennett, G. G. (2023). Recruitment of diverse community health center patients in a pragmatic weight gain prevention trial. J Clin Transl Sci, 7(1), e22. doi:10.1017/cts.2022.475
132	Mirpuri, P., Chandra, P. P., Samala, R., Agarwal, M., Doddamani, R., Kaur, K., . . . Tripathi, M. (2021). The development and efficacy of a mobile phone application to improve medication adherence for persons with epilepsy in limited resource settings: A preliminary study. Epilepsy & Behavior, 116, 107794. doi:10.1016/j.yebeh.2021.107794
133	MS, B., P, M., DE, K., SG, F., DW, W., & DJ, V. (2016). Using Intensive Longitudinal Data Collected via Mobile Phone to Detect Imminent Lapse in Smokers Undergoing a Scheduled Quit Attempt (Vol. 18). Canada.
134	Muqri, H., Shrivastava, A., Muhtadi, R., Chuck, R. S., & Mian, U. K. (2022). The Cost-Effectiveness of a Telemedicine Screening Program for Diabetic Retinopathy in New York City. Clinical Ophthalmology (Auckland, N.Z.), 16, 1505-1512. doi:10.2147/OPTH.S357766
135	Nair, U. S., Patterson, F., Rodriguez, D., & Collins, B. N. (2017). A telephone-based intervention to promote physical activity during smoking cessation: a randomized controlled proof-of-concept study. Translational Behavioral Medicine, 7(2), 138-147. doi:10.1007/s13142-016-0449-x
136	Nelson, L. A., Mulvaney, S. A., Gebretsadik, T., Johnson, K. B., & Osborn, C. Y. (2016). The MEssaging for Diabetes (MED) intervention improves short-term medication adherence among low-income adults with type 2 diabetes. Journal of Behavioral Medicine, 39(6), 995-1000. doi:10.1007/s10865-016-9774-2
137	Nelson, L. A., Spieker, A., Greevy, R., LeStourgeon, L. M., Wallston, K. A., & Mayberry, L. S. (2020). User Engagement Among Diverse Adults in a 12-Month Text Message-Delivered Diabetes Support Intervention: Results from a Randomized Controlled Trial. JMIR Mhealth Uhealth, 8(7), e17534. doi:10.2196/17534
138	Nelson, L. A., Williamson, S. E., LeStourgeon, L. M., & Mayberry, L. S. (2021). Retaining diverse adults with diabetes in a long-term trial: Strategies, successes, and lessons learned. Contemporary Clinical Trials, 105, 106388. doi:10.1016/j.cct.2021.106388
139	Newman-Casey, P. A., Musch, D. C., Niziol, L. M., Elam, A. R., Zhang, J., Moroi, S. E., . . . Woodward, M. A. (2021). Michigan Screening and Intervention for Glaucoma and Eye Health Through Telemedicine (MI-SIGHT): Baseline Methodology for Implementing and Assessing a Community-based Program. Journal of Glaucoma, 30(5), 380-387. doi:10.1097/IJG.0000000000001812
140	Nguyen, A. T., Wisniewski, J., Leang, D. W., Keller, M. S., Rosen, S., Shane, R., & Pevnick, J. M. (2023). Effect of the population health inpatient Medicare Advantage pharmacist intervention on hospital readmissions: A quasi-experimental controlled study. J Manag Care Spec Pharm, 29(3), 266-275. doi:10.18553/jmcp.2023.29.3.266
141	Nordeck, C. D., Buresh, M., Krawczyk, N., Fingerhood, M., & Agus, D. (2021). Adapting a Low-threshold Buprenorphine Program for Vulnerable Populations During the COVID-19 Pandemic. Journal of Addiction Medicine, 15(5), 364-369. doi:10.1097/ADM.0000000000000774
142	Nussbaum, D., Chatrath, S., Squirewell, C., McCormick, E., Sadur, A., Desai, S., . . . Friedman, A. (2023). Participant Satisfaction of a Community-based Telehealth Clinic for Atopic Dermatitis. J Drugs Dermatol, 22(10), 1066-1067. doi:10.36849/JDD.7561
143	Obeid, R., Beekman, L., Roizen, N., Ciccia, A., & Short, E. J. (2019). Using Telehealth to address disparities in cognitive, language, and emotion regulation problems in young children: A case illustration using the INvesT model. Birth Defects Res, 111(16), 1154-1164. doi:10.1002/bdr2.1537
144	Odugbesan, O., Wright, T., Jones, N. Y., Dei-Tutu, S., Gallagher, M. P., DeWit, E., . . . Collaborative, T. D. E. Q. I. (2024). Increasing Social Determinants of Health Screening Rates Among Six Endocrinology Centers Across the United States: Results From the T1D Exchange Quality Improvement Collaborative. Clinical Diabetes, 42(1), 49-55. doi:10.2337/cd23-0060
145	Ogunyemi, O. I., George, S., Mukherjee, S., Gandhi, M., & Jenders, R. A. (2021). Centering TechQuity through Biomedical Informatics Centers at Minority-Serving Academic Institutions Providing Informatics Solutions for Urban Safety-Net Settings. Journal of Health Care for the Poor and Underserved, 32(2), 278-289. doi:10.1353/hpu.2021.0063
146	Oldham, M., Dinu, L., Loebenberg, G., Field, M., Hickman, M., Michie, S., . . . Garnett, C. (2024). Methodological Insights on Recruitment and Retention From a Remote Randomized Controlled Trial Examining the Effectiveness of an Alcohol Reduction App: Descriptive Analysis Study. JMIR Form Res, 8, e51839. doi:10.2196/51839
147	Parks, M. J., Hughes, K. D., Keller, P. A., Lachter, R. B., Kingsbury, J. H., Nelson, C. L., & Slater, J. S. (2019). Financial incentives and proactive calling for reducing barriers to tobacco treatment among socioeconomically disadvantaged women: A factorial randomized trial. Prev Med, 129, 105867. doi:10.1016/j.ypmed.2019.105867
148	Philis-Tsimikas, A., Fortmann, A. L., Godino, J. G., Schultz, J., Roesch, S. C., Gilmer, T. P., . . . Gallo, L. C. (2022). Dulce Digital-Me: protocol for a randomized controlled trial of an adaptive mHealth intervention for underserved Hispanics with diabetes. Trials, 23(1), 80. doi:10.1186/s13063-021-05899-x
149	Piñeiro, B., Vidrine, D. J., Wetter, D. W., Hoover, D. S., Frank-Pearce, S. G., Nguyen, N., . . . Vidrine, J. I. (2018). Implementation of Ask-Advise-Connect in a safety net healthcare system: Quitline treatment engagement and smoking cessation outcomes. Transl. Behav. Med., 10(1), 163-167. doi:doi:10.1093/tbm/iby108 LK - https://rivm.on.worldcat.org/atoztitles/link?sid=EMBASE&sid=EMBASE&issn=161…
150	Platt, J. M., Keyes, K. M., & Galea, S. (2017). Efficiency or equity? Simulating the impact of high-risk and population intervention strategies for the prevention of disease. SSM Popul Health, 3, 1-8. doi:10.1016/j.ssmph.2016.11.002
151	Purnell, L., Sierra, M., Lisker, S., Lim, M. S., Bailey, E., Sarkar, U., . . . Nguyen, K. H. (2023). Acceptability and Usability of a Wearable Device for Sleep Health Among English- and Spanish-Speaking Patients in a Safety Net Clinic: Qualitative Analysis. JMIR Form Res, 7, e43067. doi:10.2196/43067
152	Pyne, J. M., Fortney, J. C., Mouden, S., Lu, L., Hudson, T. J., & Mittal, D. (2015). Cost-effectiveness of on-site versus off-site collaborative care for depression in rural FQHCs. Psychiatric Services, 66(5), 491-499. doi:10.1176/appi.ps.201400186
153	R, L., M, B., J, Y. B., Z, H., GJ, B., M, V. D., . . . M, W. (2023). Primary care detection of cognitive impairment leveraging health and consumer technologies in underserved US communities: protocol for a pragmatic randomised controlled trial of the MyCog paradigm (Vol. 13). England.
154	Ramchandran, R. S., Yilmaz, S., Greaux, E., & Dozier, A. (2020). Patient perceived value of teleophthalmology in an urban, low income US population with diabetes. PloS One, 15(1), e0225300. doi:10.1371/journal.pone.0225300
155	Reese, R. J., Slone, N. C., Soares, N., & Sprang, R. (2015). Using telepsychology to provide a group parenting program: A preliminary evaluation of effectiveness. Psychological Services, 12(3), 274-282. doi:10.1037/ser0000018
156	RI, S., JR, S., RG, T., AM, D., GA, C., & BA, E. (2019). Design of a randomized trial testing a multi-level weight-control intervention to reduce obesity and related health conditions in low-income workers (Vol. 79). United States.
157	Sarkar, A., Nwokocha, C., Nash, S. G., & Grigoryan, L. (2024). Empowering Low-Income Patients with Home Blood Pressure Monitors to Improve Hypertension Control. Journal of the American Board of Family Medicine, 37(2), 187-195. doi:10.3122/jabfm.2023.230357R1
158	SB, V., AD, D., M, K., & Y, X. (2022). Adapting parent-focused interventions for diverse caregivers of children with intellectual and developmental disabilities: Lessons learned during global crises. Journal of policy and practice in intellectual disabilities, 1-13. doi:doi:
159	Schaap, R., Schaafsma, F. G., Bosma, A. R., Huysmans, M. A., Boot, C. R. L., & Anema, J. R. (2020). Improving the health of workers with a low socioeconomic position: Intervention Mapping as a useful method for adaptation of the Participatory Approach. BMC Public Health, 20(1), 961. doi:10.1186/s12889-020-09028-2
160	Schlechter, C. R., Del Fiol, G., Jones, D. R., Orleans, B., Gibson, B., Nahum-Shani, I., . . . Wetter, D. W. (2023). Increasing the reach of evidence-based interventions for weight management and diabetes prevention among Medicaid patients: study protocol for a pilot Sequential Multiple Assignment Randomised Trial (Vol. 13). England.
161	Schultz, C. L., Bocarro, J. N., Hipp, J. A., Bennett, G. J., & Floyd, M. F. (2022). Prescribing Time in Nature for Human Health and Well-Being: Study Protocol for Tailored Park Prescriptions. Front Digit Health, 4, 932533. doi:10.3389/fdgth.2022.932533
162	Siminerio, L., Krall, J., Johnson, P., Ruppert, K., Hammoudeh, R., Bandi, A., & Ng, J. M. (2023). Examining a Diabetes Self-Management Education and Support Telemedicine Model With High-Risk Patients in a Rural Community. Journal of Diabetes Science and Technology, 17(5), 1190-1197. doi:10.1177/19322968231180884
163	Simione, M., Frost, H. M., Farrar-Muir, H., Luo, M., Granadeno, J., Torres, C., . . . Taveras, E. M. (2024). Evaluating the Implementation of the Connect for Health Pediatric Weight Management Program. JAMA Netw Open, 7(1), e2352648. doi:10.1001/jamanetworkopen.2023.52648
164	Smith, N. R., Simione, M., Farrar-Muir, H., Granadeno, J., Moreland, J. W., Wallace, J., . . . Levy, D. E. (2023). Costs to Implement a Pediatric Weight Management Program Across 3 Distinct Contexts. Medical Care, 61(10), 715-725. doi:10.1097/MLR.0000000000001891
165	Smith, S. M., Bais, B., Ismaili M'hamdi, H., Schermer, M. H., & Steegers-Theunissen, R. P. (2024). Stimulating Preconception Care Uptake by Women With a Vulnerable Health Status Through a Mobile Health App (Pregnant Faster): Pilot Feasibility Study. JMIR Hum Factors, 11, e53614. doi:10.2196/53614
166	Smith, S. M., Bais, B., Ismaili M'hamdi, H., Schermer, M. H. N., & Steegers-Theunissen, R. P. M. (2023). Stimulating the Uptake of Preconception Care by Women With a Vulnerable Health Status Through mHealth App-Based Nudging (Pregnant Faster): Cocreation Design and Protocol for a Cohort Study. JMIR Res Protoc, 12, e45293. doi:10.2196/45293
167	Smithers, L. G., MacPhail, C., Chan, L., Downes, M., Neadley, K., & Boyd, M. (2024). In-person versus electronic screening for social risks among carers of pediatric inpatients: A mixed methods randomized trial. European Journal of Pediatrics, 183(5), 2301-2309. doi:10.1007/s00431-024-05470-1
168	Spierling Bagsic, S. R., Savin, K. L., Soriano, E. C., San Diego, E. R. N., Orendain, N., Clark, T., . . . Fortmann, A. L. (2023). Process evaluation of Dulce Digital-Me: an adaptive mobile health (mHealth) intervention for underserved Hispanics with diabetes. Translational Behavioral Medicine, 13(9), 635-644. doi:10.1093/tbm/ibad020
169	Stanimirovic, A., Francis, T., Cooper Reed, A., Meerai, S., Sutakovic, O., Merritt, R., . . . Rac, V. (2021). Impact of Intersecting Systems of Oppression on Diabetic Retinopathy Screening Among Those Who Identify as Women of Low Socioeconomic Status: Protocol for a Convergent Mixed Methods Study. JMIR Res Protoc, 10(3), e23492. doi:10.2196/23492
170	Staples, L. G., Webb, N., Asrianti, L., Cross, S., Rock, D., Kayrouz, R., . . . Titov, N. (2022). A Comparison of Self-Referral and Referral via Primary Care Providers, through Two Similar Digital Mental Health Services in Western Australia. Int J Environ Res Public Health, 19(2). doi:10.3390/ijerph19020905
171	Steinberg, D. M., Askew, S., Lanpher, M. G., Foley, P. B., Levine, E. L., & Bennett, G. G. (2014). The effect of a "maintain, don't gain" approach to weight management on depression among black women: results from a randomized controlled trial. American Journal of Public Health, 104(9), 1766-1773. doi:10.2105/AJPH.2014.302004
172	Steinberg, D. M., Levine, E. L., Lane, I., Askew, S., Foley, P. B., Puleo, E., & Bennett, G. G. (2014). Adherence to self-monitoring via interactive voice response technology in an eHealth intervention targeting weight gain prevention among Black women: randomized controlled trial (Vol. 16). Canada.
173	Swendeman, D., Rotheram-Borus, M. J., Arnold, E. M., Fernandez, M. I., Comulada, W. S., Lee, S. J., . . . Adolescent, H. I. V. M. T. N. C. S. T. (2024). Optimal strategies to improve uptake of and adherence to HIV prevention among young people at risk for HIV acquisition in the USA (ATN 149): a randomised, controlled, factorial trial. Lancet Digit Health, 6(3), e187-e200. doi:10.1016/S2589-7500(2…
174	Tacey, A., Behne, J., Patten, R. K., Ngo, M. T., Thomas, R., Ancilleri, J., . . . Pascoe, M. (2023). Development of a Digital Health Intervention to Support Patients on a Waitlist for Orthopedic Specialist Care: Co-Design Study. JMIR Form Res, 7, e41974. doi:10.2196/41974
175	Talal, A. H., Sofikitou, E. M., Jaanimagi, U., Zeremski, M., Tobin, J. N., & Markatou, M. (2020). A framework for patient-centered telemedicine: Application and lessons learned from vulnerable populations. Journal of Biomedical Informatics, 112, 103622. doi:10.1016/j.jbi.2020.103622
176	Talavera, G. A., Castaneda, S. F., Mendoza, P. M., Lopez-Gurrola, M., Roesch, S., Pichardo, M. S., . . . Gallo, L. C. (2021). Latinos understanding the need for adherence in diabetes (LUNA-D): a randomized controlled trial of an integrated team-based care intervention among Latinos with diabetes. Translational Behavioral Medicine, 11(9), 1665-1675. doi:10.1093/tbm/ibab052
177	Tamura, K., Vijayakumar, N. P., Troendle, J. F., Curlin, K., Neally, S. J., Mitchell, V. M., . . . Powell-Wiley, T. M. (2020). Multilevel mobile health approach to improve cardiovascular health in resource-limited communities with Step It Up: a randomised controlled trial protocol targeting physical activity. BMJ Open, 10(12), e040702. doi:10.1136/bmjopen-2020-040702
178	Taylor, N. K., Aboelata, N., Mahoney, M., Seay-Morrison, T., Singh, B., Chang, S. I., . . . Shaw, J. G. (2021). Building Bridges Between Community Health Centers and Academic Medical Centers in a COVID-19 Pandemic. Journal of the American Board of Family Medicine, 34(Suppl), S229-S232. doi:10.3122/jabfm.2021.S1.200182
179	Thirumalai, M., Zengul, A. G., & Evans, E. (2021). Challenges and Lessons Learned From a Telehealth Community Paramedicine Program for the Prevention of Hypoglycemia: Pre-Post Pilot Feasibility Study. JMIR diabetes, 6(3), e26941. doi:10.2196/26941
180	Thomas, S., Yingling, L., Adu-Brimpong, J., Mitchell, V., Ayers, C. R., Wallen, G. R., . . . Powell-Wiley, T. M. (2016). Mobile Health Technology Can Objectively Capture Physical Activity (PA) Targets Among African-American Women Within Resource-Limited Communities-the Washington, D.C. Cardiovascular Health and Needs Assessment. J Racial Ethn Health Disparities. doi:10.1007/s40615-016-0290-4
181	Threatt, T. B., & Ward, E. D. (2017). Telehealth for diabetes self-management education and support in an underserved, free clinic population: A pilot study. Journal of the American Pharmacists Association, 57(3), 402-406. doi:10.1016/j.japh.2017.01.019
182	Timm, L., Karlsson, I., Sidney Annerstedt, K., Absetz, P., Forsberg, B. C., Daivadanam, M., & Molsted Alvesson, H. (2021). Intervention Fidelity Focusing on Interaction between Participants and Facilitators in a Telephone-Delivered Health Coaching Intervention for the Prevention and Management of Type 2 Diabetes. Nutrients, 13(11). doi:10.3390/nu13113862
183	Tookes, H. E., Bartholomew, T. S., Suarez, E., Ekowo, E., Ginoza, M., Forrest, D. W., . . . Metsch, L. R. (2021). Acceptability, feasibility, and pilot results of the tele-harm reduction intervention for rapid initiation of antiretrovirals among people who inject drugs. Drug and Alcohol Dependence, 229(Pt A), 109124. doi:10.1016/j.drugalcdep.2021.109124
184	Tripicchio, G. L., Kay, M., Herring, S., Cos, T., Bresnahan, C., Gartner, D., . . . Bass, S. B. (2021). Development and Preliminary Feasibility of iByte4Health: A Mobile Health (mHealth) Pediatric Obesity Prevention Intervention to Engage Parents with Low-Income of Children 2-9 Years. Nutrients, 13(12). doi:10.3390/nu13124240
185	Tuot, D. S., Rubinsky, A. D., Velasquez, A., McCulloch, C. E., Schillinger, D., Handley, M. A., . . . Powe, N. R. (2019). Interventions to Improve Blood Pressure Control Among Socioeconomically Disadvantaged Patients With CKD: Kidney Awareness Registry and Education Pilot Randomized Controlled Trial. Kidney Med, 1(5), 242-252. doi:10.1016/j.xkme.2019.07.004
186	van Charante, E. P. M., Hoevenaar-Blom, M. P., Song, M., Andrieu, S., Barnes, L., Birck, C., . . . Wei, X. (2024). Prevention of dementia using mobile phone applications (PRODEMOS): a multinational, randomised, controlled effectiveness–implementation trial. Lancet. Health. Longev., 5(6), e431-e442. doi:doi:10.1016/S2666-7568(24)00068-0 LK - https://rivm.on.worldcat.org/atoztitles/link?sid=EMBASE&…
187	Vani, K., Katehis, I., Bernstein, P. S., Lebron-Reyes, C., Chung, H., Bruney, T., & Karkowsky, C. E. (2023). Piloting a prenatal care smartphone application and care navigation intervention at a federally qualified health center. Am J Obstet Gynecol MFM, 5(10), 101135. doi:10.1016/j.ajogmf.2023.101135
188	Vaughan, E. M., Cardenas, V. J., Jr., Chan, W., Amspoker, A. B., Johnston, C. A., Virani, S. S., . . . Naik, A. D. (2024). Implementation and Evaluation of a mHealth-Based Community Health Worker Feedback Loop for Hispanics with and at Risk for Diabetes. Journal of General Internal Medicine, 39(2), 229-238. doi:10.1007/s11606-023-08434-7
189	Vaughan, E. M., Hyman, D. J., Naik, A. D., Samson, S. L., Razjouyan, J., & Foreyt, J. P. (2021). A Telehealth-supported, Integrated care with CHWs, and MEdication-access (TIME) Program for Diabetes Improves HbA1c: a Randomized Clinical Trial. Journal of General Internal Medicine, 36(2), 455-463. doi:10.1007/s11606-020-06017-4
190	Vaughan, E. M., Johnson, E., Naik, A. D., Amspoker, A. B., Balasubramanyam, A., Virani, S. S., . . . Foreyt, J. P. (2022). Long-Term Effectiveness of the TIME Intervention to Improve Diabetes Outcomes in Low-Income Settings: a 2-Year Follow-Up. Journal of General Internal Medicine, 37(12), 3062-3069. doi:10.1007/s11606-021-07363-7
191	Venkatesh, K. K., Joseph, J. J., Swoboda, C., Strouse, R., Hoseus, J., Baker, C., . . . Fareed, N. (2023). Multicomponent provider-patient intervention to improve glycaemic control in Medicaid-insured pregnant individuals with type 2 diabetes: clinical trial protocol for the ACHIEVE study. BMJ Open, 13(5), e074657. doi:10.1136/bmjopen-2023-074657
192	Vos, A. L., de Bruijn, G. J., Klein, M. C. A., Lakerveld, J., Boerman, S. C., & Smit, E. G. (2023). SNapp, a Tailored Smartphone App Intervention to Promote Walking in Adults of Low Socioeconomic Position: Development and Qualitative Pilot Study. JMIR Form Res, 7, e40851. doi:10.2196/40851
193	Vu, M., Nguyen, V., Vishwanath, S., Wolfe, C., & Patel, S. (2018). Know Your Numbers: Creation and implementation of a novel community health mobile application (app) by student pharmacists. Journal of the American Pharmacists Association, 58(2), 191-198 e192. doi:10.1016/j.japh.2017.11.003
194	Vuocolo, B., Sierra, R., Brooks, D., Holder, C., Urbanski, L., Rodriguez, K., . . . Lalani, S. R. (2023). Reducing Time to Diagnosis of Rare Genetic Diseases in a Medically Underserved Hispanic Population- Lessons Learned for Meaningful Engagement. United States.
195	Wang, C., Paasche-Orlow, M. K., Bowen, D. J., Cabral, H., Winter, M. R., Norkunas Cunningham, T., . . . Bickmore, T. (2021). Utility of a virtual counselor (VICKY) to collect family health histories among vulnerable patient populations: A randomized controlled trial. Patient Education and Counseling, 104(5), 979-988. doi:10.1016/j.pec.2021.02.034
196	Warren, J. R., Hopfer, S., Fields, E. J., Natarajan, S., Belue, R., McKee, F. X., . . . Lebed, J. P. (2023). Digital HPV education to increase vaccine uptake among low income women. PEC Innov, 2, 100111. doi:10.1016/j.pecinn.2022.100111
197	Wayne, N., & Ritvo, P. (2014). Smartphone-enabled health coach intervention for people with diabetes from a modest socioeconomic strata community: single-arm longitudinal feasibility study. J Med Internet Res, 16(6), e149. doi:10.2196/jmir.3180
198	Wolf, M. S., Seligman, H., Davis, T. C., Fleming, D. A., Curtis, L. M., Pandit, A. U., . . . Dewalt, D. A. (2014). Clinic-based versus outsourced implementation of a diabetes health literacy intervention. Journal of General Internal Medicine, 29(1), 59-67. doi:10.1007/s11606-013-2582-2
199	Wolf, S. L., Sahu, K., Bay, R. C., Buchanan, S., Reiss, A., Linder, S., . . . Alberts, J. (2015). The HAAPI (Home Arm Assistance Progression Initiative) Trial: A Novel Robotics Delivery Approach in Stroke Rehabilitation. Neurorehabilitation and Neural Repair, 29(10), 958-968. doi:10.1177/1545968315575612
200	Worster, B., Waldman, L., Garber, G., Zhan, T., Lopez, A., Trachtenberg, O., . . . Leader, A. (2023). Increasing equitable access to telehealth oncology care in the COVID-19 National Emergency: Creation of a telehealth task force. Cancer Med, 12(3), 2842-2849. doi:10.1002/cam4.5176
201	Zhang, T. M., Millery, M., Aguirre, A. N., & Kukafka, R. (2023). A randomized controlled trial of generic and localized MedlinePlus-based information resources for hard-to-reach urban Hispanic community. Journal of the American Medical Informatics Association, 30(2), 282-291. doi:10.1093/jamia/ocac213
202	Zuniga, J., Garcia, A. A., Silva, L., Park, J. M., & Barrera, Y. (2019). Pilot test of an educational intervention to improve self-management of diabetes in persons living with HIV. Pilot Feasibility Stud, 5(1), 111. doi:10.1186/s40814-019-0495-5
Additional papers (n=7) for full-text screening that were identified via literature reviews that were found during the title/abstract screening phase
203	Benitez, T. J., Cherrington, A. L., Joseph, R. P., Keller, C., Marcus, B., Meneses, K., . . . Pekmezi, D. (2015). Using Web-Based Technology to Promote Physical Activity in Latinas: Results of the Muévete Alabama Pilot Study. Computers, Informatics, Nursing, 33(7), 315-324. doi:10.1097/cin.0000000000000162
204	Cavallo, D. N., Martinez, R., Webb Hooper, M., & Flocke, S. (2021). Feasibility of a social media-based weight loss intervention designed for low-SES adults. Translational Behavioral Medicine, 11(4), 981-992. doi:10.1093/tbm/ibaa070
205	Cherrington, A. L., Agne, A. A., Lampkin, Y., Birl, A., Shelton, T. C., Guzman, A., & Willig, J. H. (2015). Diabetes Connect: Developing a Mobile Health Intervention to Link Diabetes Community Health Workers With Primary Care. Journal of Ambulatory Care Management, 38(4), 333-345. doi:10.1097/jac.0000000000000110
206	Davis, C., Bender, M., Smith, T., & Broad, J. (2015). Feasibility and Acute Care Utilization Outcomes of a Post-Acute Transitional Telemonitoring Program for Underserved Chronic Disease Patients. Telemedicine Journal and e-Health, 21(9), 705-713. doi:10.1089/tmj.2014.0181
207	Nollen, N. L., Mayo, M. S., Carlson, S. E., Rapoff, M. A., Goggin, K. J., & Ellerbeck, E. F. (2014). Mobile Technology for Obesity Prevention: A Randomized Pilot Study in Racial- and Ethnic-Minority Girls. American Journal of Preventive Medicine, 46(4), 404-408. doi:https://doi.org/10.1016/j.amepre.2013.12.011
208	Smith, J. J., Morgan, P. J., Plotnikoff, R. C., Dally, K. A., Salmon, J., Okely, A. D., . . . Lubans, D. R. (2014). Smart-phone obesity prevention trial for adolescent boys in low-income communities: the ATLAS RCT. Pediatrics, 134(3), e723-731. doi:10.1542/peds.2014-1012
209	Wayne, N., Perez, D. F., Kaplan, D. M., & Ritvo, P. (2015). Health Coaching Reduces HbA1c in Type 2 Diabetic Patients From a Lower-Socioeconomic Status Community: A Randomized Controlled Trial. J Med Internet Res, 17(10), e224. doi:10.2196/jmir.4871
