# Supplementary material for: A systematic literature review to identify delivery strategies of digital health for low SEP populations
Source: Research Square preprint supplement (doi:10.21203/rs.3.rs-8659891/v1), 2026-02-02
Supplement: Supplementary file 7 [file d732035c689d41325f6b0f91.xlsx]

## Sheet: Sheet1
PsycINFO 07-06-2024
No.	Query	Results
#1	TI ( socioeconomic* OR “social class*” OR “socio-economic*” OR “social economic*” OR SES OR SEP OR socio* OR “social status” ) OR AB ( socioeconomic* OR “social class*” OR “socio-economic*” OR “social economic*” OR SES OR SEP OR socio* OR “social status” ) *	270,991
#2	AB (“vulnerable minorit*” OR “vulnerable minority population*” OR “vulnerable people*” OR “vulnerable person*” OR “vulnerable population*” OR “marginal*” OR “disadvantag*” OR “disparity in health” OR “health disparit*” OR “health economic disparit*” OR “health inequalit*” OR “health inequit*” OR “inequalit* in health” OR “inequit* in health” OR “underserv*” OR “povert*” OR “risk*” OR “neighb*” OR…	327,004
#3	#1 AND #2	84,829
#4	AB ('telemed*' OR "virtual medicine" OR 'telemed*' OR 'telecommunication' OR 'telehealth*' OR 'tele-health*' OR "tele health*" OR "telecare" OR 'tele-care' OR "tele care" OR "electronic health*" OR 'ehealth*' OR 'telemonitoring' OR 'm-health*' OR 'e-health*' OR "mobile health*" OR 'mhealth*' OR "digital health*" OR "health* information technology" OR "health* information systems" OR "interactive …	15,038
#5	#3 AND #4	645
#6	AB(“strateg*” OR “reach*” OR “retention*” OR “recruitment*” OR deliver* OR “outreach*” OR “approach*” OR “outreach program*” OR “advert*” OR “social market*” OR “marketing” OR “social service deliver*” OR “health service*” OR “community health service*” OR “welfare service” OR “community service*” OR “health promotion*” OR “delivery channel*” OR “dissemination strateg*” OR “dissemination” OR “dep…	591,633
#6	#1 AND #4 AND #6*	488
#9	#1 AND #4 AND #6 **	272
* apply equivalent subjects (expanders)
**Published in last ten years 01-01-2024 – 07-06-2024, all methodologies except literature reviews or meta-analysis, apply equivalent subjects (expanders)
Embase Basic Search Query (07-06-2024)
No.	Query	Results
#1	'socioeconomics'/exp	1,575,239
#2	‘socioeconomic*':ab,ti OR ‘social class*’:ab,ti OR ‘socio-economic*':ab,ti OR 'social economic*':ab,ti OR 'SES':ab,ti OR 'SEP':ab,ti OR 'socio*':ab,ti OR 'social status':ab,ti	494,246
#3	#1 OR #2	1,904,463
#4	'vulnerable minorit*':ab,ti OR 'vulnerable minority population*':ab,ti OR 'vulnerable people*':ab,ti OR 'vulnerable person*':ab,ti OR 'vulnerable population*':ab,ti OR 'marginal*':ab,ti OR 'disadvantag*':ab,ti OR 'disparity in health':ab,ti OR 'health disparit*':ab,ti OR 'health economic disparit*':ab,ti OR 'health inequalit*':ab,ti OR 'health inequit*':ab,ti OR 'inequalit* in health':ab,ti OR 'i…	5,621,935
#5	#3 AND #4	519,537
#6	telemedicine/exp OR “digital health”/exp	77,832
#7	'telemed*':ab,ti OR 'virtual medicine':ab,ti OR 'telecommunication':ab,ti OR 'telehealth*':ab,ti OR 'tele-health*':ab,ti OR 'tele health*':ab,ti OR 'telecare':ab,ti OR 'tele-care':ab,ti OR 'tele care':ab,ti OR 'electronic health*':ab,ti OR 'ehealth*':ab,ti OR 'telemonitoring':ab,ti OR 'm-health*':ab,ti OR 'e-health*':ab,ti OR 'mobile health*':ab,ti OR 'mhealth*':ab,ti OR 'digital health*':ab,ti O…	143,163
#8	#6 OR #7	182,473
#9	#5 AND #8	8,582
#10	'health care delivery'/exp	4,565,930
#11	'strateg*':ab,ti OR 'reach*':ab,ti OR 'retention*':ab,ti OR 'recruitment*':ab,ti OR deliver*:ab,ti OR 'outreach*':ab,ti OR 'approach*':ab,ti OR 'outreach program*':ab,ti OR 'advert*':ab,ti OR 'social market*':ab,ti OR 'marketing':ab,ti OR 'social service deliver*':ab,ti OR 'health service*':ab,ti OR 'community health service*':ab,ti OR 'welfare service':ab,ti OR 'community service*':ab,ti OR 'hea…	8,816,300
#12	#10 OR #11
		12,015,171
#13	#5 AND #8 AND #12
		9,532
#14	([article]/lim OR [article in press]/lim) AND [embase]/lim AND [2014-2024]/py
#15	#5 AND #8 AND #12 AND #14*	3,762
*Last 10 years (01-01-2014 07-06-2024), article, article in press , EMBASE (Not MEDLINE)
PubMed (07-06-2024)
No.	Query	Results
#1	(socioeconomic status[MeSH Terms]) AND (social class[MeSH Terms])	46,319
#2	socioeconomic*[Title/Abstract] OR "social class*"[Title/Abstract] OR "socio-economic*"[Title/Abstract] OR "social economic*"[Title/Abstract] OR SES[Title/Abstract] OR SEP[Title/Abstract] OR socio*[Title/Abstract] OR "social status"[Title/Abstract]	395,354
#3	#1 OR #2	411,796
#4	"vulnerable minorit*"[Title/Abstract] OR "vulnerable minority population*"[Title/Abstract] OR "vulnerable people*"[Title/Abstract] OR "vulnerable person*"[Title/Abstract] OR "vulnerable population*"[Title/Abstract] OR "marginal*"[Title/Abstract] OR "disadvantag*"[Title/Abstract] OR "disparity in health"[Title/Abstract] OR "health disparit*"[Title/Abstract] OR "health inequalit*"[Title/Abstract] O…	3,504,573
#5	#3 AND #4	180,831
#6	"Telemedicine" [MeSH] OR “Digital Health” [MeSH]	48,066
#7	'telemed*'[Title/Abstract] OR "virtual medicine"[Title/Abstract] OR 'telemed*'[Title/Abstract] OR 'telecommunication'[Title/Abstract] OR 'telehealth*'[Title/Abstract] OR 'tele-health*'[Title/Abstract] OR "tele health*"[Title/Abstract] OR "telecare"[Title/Abstract] OR 'tele-care'[Title/Abstract] OR "tele care"[Title/Abstract] OR "electronic health*"[Title/Abstract] OR 'ehealth*'[Title/Abstract] OR…	124,758
#8	#4 OR #5	141,733
#9	#5 AND #8	2,943
#10	delivery of health care[MeSH]	1,319,099
#11	'strateg*'[Title/Abstract] OR 'reach*'[Title/Abstract] OR 'retention*'[Title/Abstract] OR 'recruitment*'[Title/Abstract] OR deliver*'[Title/Abstract] OR 'outreach*'[Title/Abstract] OR 'approach*'[Title/Abstract] OR "outreach program*"[Title/Abstract] OR "advert*"[Title/Abstract] OR "social market*"[Title/Abstract] OR "marketing"[Title/Abstract] OR "social service deliver*"[Title/Abstract] OR "hea…	6,979,725
#12	#10 OR #11	7,814,975
#11	#5 AND #8 and #11	2,428
#12	#5 AND #8 and #11 *	1.903
*2014-01-01 until 07-06-2024, full text and excluded publication type: review
Web of Science Basic 07-06-2024
No.	Query	Results
#1	(TI=(socioeconomic* OR “social class*” OR “socio-economic*” OR “social economic*” OR SES OR SEP OR socio* OR “social status” )) OR AB=(socioeconomic* OR “social class*” OR “socio-economic*” OR “social economic*” OR SES OR SEP OR socio* OR “social status” )	438,266
#2	(TI=(“vulnerable minorit*” OR “vulnerable minority population*” OR “vulnerable people*” OR “vulnerable person*” OR “vulnerable population*” OR “marginal*” OR “disadvantag*” OR “disparity in health” OR “health disparit*” OR “health economic disparit*” OR “health inequalit*” OR “health inequit*” OR “inequalit* in health” OR “inequit* in health” OR “underserv*” OR “povert*” OR “risk*” OR “neighb*” O…	3,355,116
#3	#1 AND #2	161,343
#4	(TI=('telemed*' OR "virtual medicine" OR 'telemed*' OR 'telecommunication' OR 'telehealth*' OR 'tele-health*' OR "tele health*" OR "telecare" OR 'tele-care' OR "tele care" OR "electronic health*" OR 'ehealth*' OR 'telemonitoring' OR 'm-health*' OR 'e-health*' OR "mobile health*" OR 'mhealth*' OR "digital health*" OR "health* information technology" OR "health* information systems" OR "interactive…	106,723
#5	#3 AND #4	2,154
#6	(TI=('strateg*' or 'reach*' or 'retention*' or 'recruitment*' or deliver*' or 'outreach*' or 'approach*' or “outreach program*” or “advert*” or “social market*” or “marketing” or “social service deliver*” or “health service*” or “community health service*” or “welfare service” or “community service*” or “health promotion*” or “delivery channel*” or “dissemination strateg*” or 'dissemination' or ‘…	7,487,778
#7	#3 AND #4 AND #6	1,590
#8	AND 2024 or 2023 or 2022 or 2020 or 2021 or 2019 or 2018 or 2017 or 2016 or 2015 or 2014 (Publication Years) and Review Article (Exclude – Document Types)
#9	#3 AND #4 AND #6 AND #8	1,392
Search query: https://www.webofscience.com/wos/woscc/summary/ec6820b0-692a-408e-913f-affe32106712-f22ba250/relevance/1
Sociological Abstracts (which includes the Social Work Abstracts database) 07-06-2024
No.	Query	Results
#1	title(socioeconomic* OR “social class*” OR “socio-economic*” OR “social economic*” OR SES OR SEP OR socio* OR “social status”) OR abstract(socioeconomic* OR “social class*” OR “socio-economic*” OR “social economic*” OR SES OR SEP OR socio* OR “social status”)	200,330
#2	[STRICT]title(("vulnerable minority") OR “vulnerable minority population*” OR ("vulnerable people") OR ("vulnerable person" OR "vulnerable persons") OR ("vulnerable population" OR "vulnerable populations") OR “marginal*” OR “disadvantag*” OR “disparity in health” OR ("health disparities" OR "health disparity") OR “health economic disparit*” OR ("health inequalities" OR "health inequality") OR ("h…	356,968
#3	#1 AND #2	43,632
#4	title('telemed*' OR "virtual medicine" OR 'telemed*' OR 'telecommunication' OR 'telehealth*' OR 'tele-health*' OR "tele health*" OR "telecare" OR 'tele-care' OR "tele care" OR "electronic health*" OR 'ehealth*' OR 'telemonitoring' OR 'm-health*' OR 'e-health*' OR "mobile health*" OR 'mhealth*' OR "digital health*" OR "health* information technology" OR "health* information systems" OR "interactiv…	3,186
#5	#3 AND #4	3,186
#6	[STRICT] title('strateg*' or 'reach*' or 'retention*' or 'recruitment*' or deliver*' or 'outreach*' or 'approach*' or “outreach program*” or “advert*” or “social market*” or “marketing” or “social service deliver*” or “health service*” or “community health service*” or “welfare service” or “community service*” or “health promotion*” or “delivery channel*” or “dissemination strateg*” or 'dissemina…	536,660
#8	#5 AND #6	70
#9	#5 AND #6 + *	31
*Filters: Peer reviewed only, last 10 years (01-01-2014 – 07-06-2024), literature reviews excluded
Search query: https://tilburguniversity.idm.oclc.org/login?url=https://www.proquest.com/search/2638845?accountid=14338
